# Supplementary material for: Genomic Basis of Multiple Myeloma Subtypes from the MMRF CoMMpass Study
Source: bioRxiv or medRxiv preprint supplement (doi:10.1101/2021.08.02.21261211), 2021-08-05
Supplement: Supplementary file [file media-1.pdf]

|    |                                                                            |    |
|----|----------------------------------------------------------------------------|----|
| 1  | <b>Supplemental Figures</b>                                                |    |
| 2  | <b>Table of Contents</b>                                                   |    |
| 3  | <b>1 Cohort Description</b>                                                | 2  |
| 4  | 1.1 Survival Outcomes of the Cohort                                        | 2  |
| 5  | 1.2 Survival Outcomes of Patients with High Risk Molecular Features        | 3  |
| 6  | 1.3 Baseline Molecular Assay Intersection                                  | 4  |
| 7  | <b>2 Identification of DNA Subtypes of Multiple Myeloma</b>                | 5  |
| 8  | 2.1 Cluster Number Determination from CN Consensus Clustering              | 5  |
| 9  | 2.2 Consistency of Subtype Assignments by CN Clustering                    | 6  |
| 10 | 2.3 CN Consensus Clustering Matrix                                         | 7  |
| 11 | 2.4 CN Density Plots for Subtype Defining Events                           | 8  |
| 12 | 2.5 Survival Outcomes for HRD and NHRD Patients                            | 9  |
| 13 | 2.6 Survival Outcomes for Patients with Amp1q and Del13q                   | 10 |
| 14 | <b>3 Identification of RNA Subtypes of Multiple Myeloma</b>                | 11 |
| 15 | 3.1 Cluster Number Determination from Gene Expression Consensus Clustering | 11 |
| 16 | 3.2 Consistency of Subtype Assignments by RNA Expression Clustering        | 12 |
| 17 | 3.3 RNAseq Consensus Clustering Matrix                                     | 13 |
| 18 | 3.4 RNA Subtypes and Association with Copy Number                          | 14 |
| 19 | 3.5 Relationship between CoMMpass and Zhan et al. Expression Subtypes      | 15 |
| 20 | 3.6 Relationship between CoMMpass and Broyl et al. Expression Subtypes     | 16 |
| 21 | 3.7 CCND1/2/3 and PAX5 Expression Across RNA Subtypes                      | 17 |
| 22 | 3.8 Relationship between Proliferation Index and CoMMpass Subtypes         | 18 |
| 23 | 3.9 Prevalence of Bone Disease Across RNA Subtypes                         | 19 |
| 24 | 3.10 NFkB Index Distribution by RNA Subtype                                | 20 |
| 25 | 3.11 NINJ1 and TP53 Expression Across RNA Subtypes                         | 21 |
| 26 | 3.12 Low Purity Association with Low Purity Metrics                        | 22 |
| 27 | <b>4 Clinical and Molecular Associations with RNA Subtypes</b>             | 23 |
| 28 | 4.1 Mechanisms of RB1 Complete Loss at Diagnosis                           | 23 |
| 29 | <b>5 Transition to PR at Progression and Link with G1/S</b>                | 24 |
| 30 | 5.1 Change in RNA Subtype Probabilities Over Time                          | 24 |
| 31 | 5.2 Overall Survival of Patients After Transition to PR Subtype            | 25 |
| 32 | 5.3 Deletion of of CDKN2C in Patients that Transitioned to PR              | 26 |
| 33 | 5.4 Deletion of of CDKN1B in Patient that Transitioned to PR               | 27 |

34 **1 Cohort Description**

35 **1.1 Survival Outcomes of the Cohort**

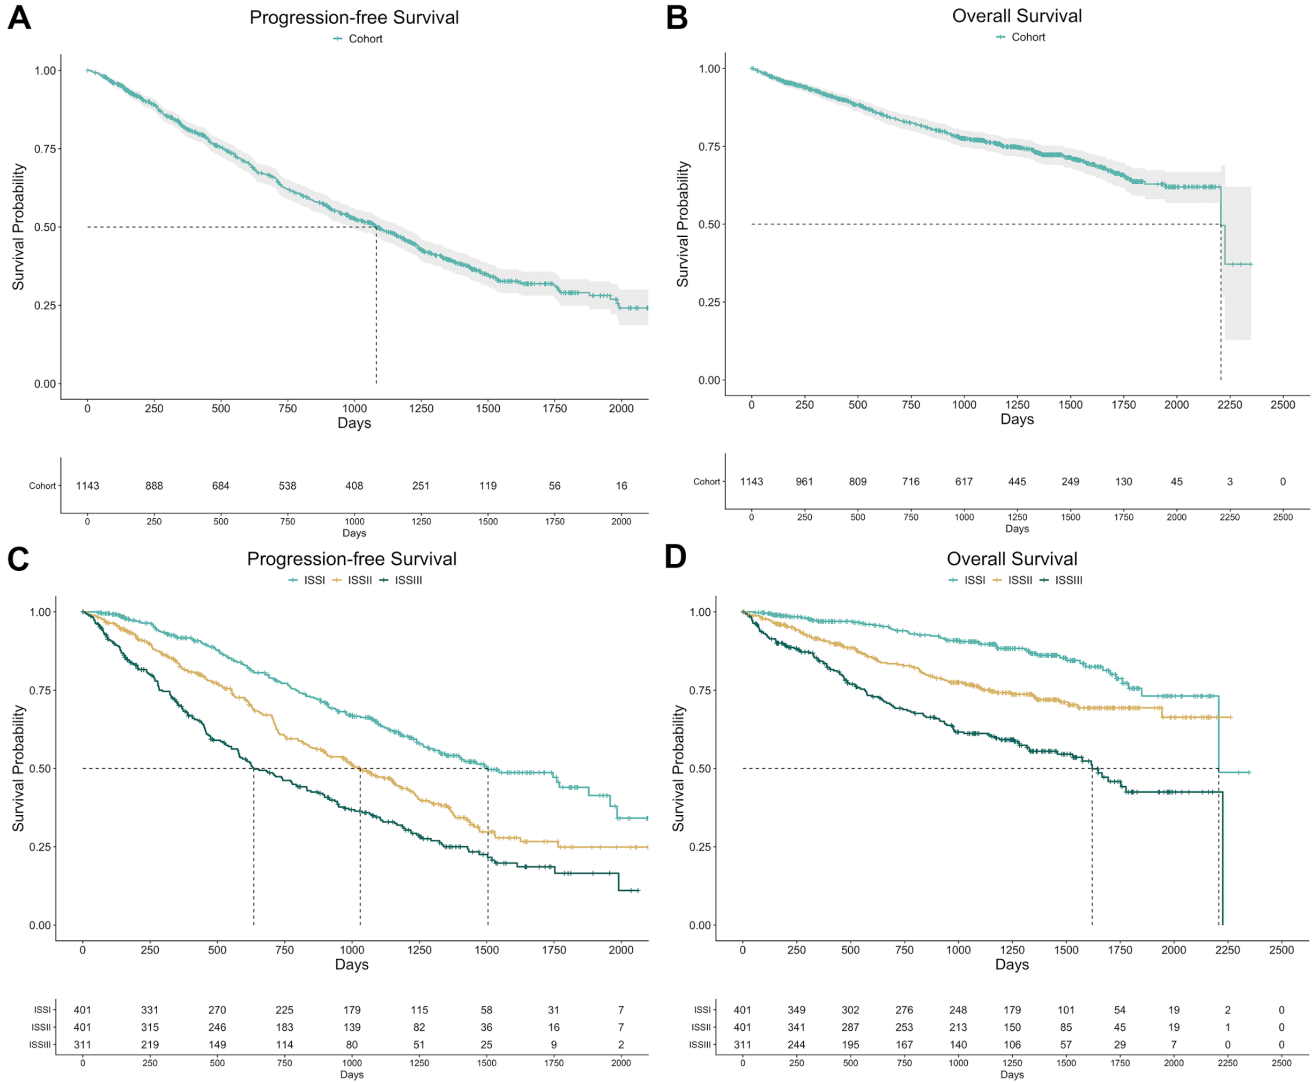

36  
 37 Progression-free (PFS) and overall (OS) survival outcomes of the CoMMpass cohort (A-B) and the  
 38 CoMMpass cohort stratified by ISS stage (C-D). (A-B) Median PFS (36 months) and OS (74 months) of  
 39 the cohort has been met, however as of the IA14 release there is insufficient cohort follow up to accurately  
 40 report median cohort OS within a 95% confidence interval. (C) PFS outcomes for patients classified as  
 41 ISSI (50 months), ISSII (34 months), and ISSIII (21 months) at diagnosis. (D) OS outcomes for patients  
 42 classified as ISSI (74 months), ISSII (median not met), and ISSIII (54 months) at diagnosis. ISS stage  
 43 stratified patients into three clinically distinct classes, with patients classified as ISSII at diagnosis having  
 44 poor OS and PFS outcomes as compared to patients classified as ISSI ( $p < 0.001$ ), and patients classified  
 45 as ISSIII having poor PFS outcomes as compared to patients classified as ISSII ( $p < 0.001$ ).

46 1.2 Survival Outcomes of Patients with High Risk Molecular Features

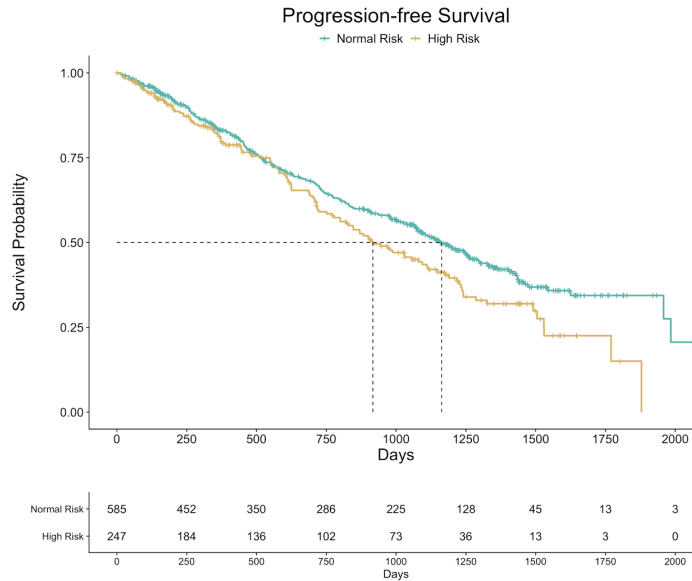

47

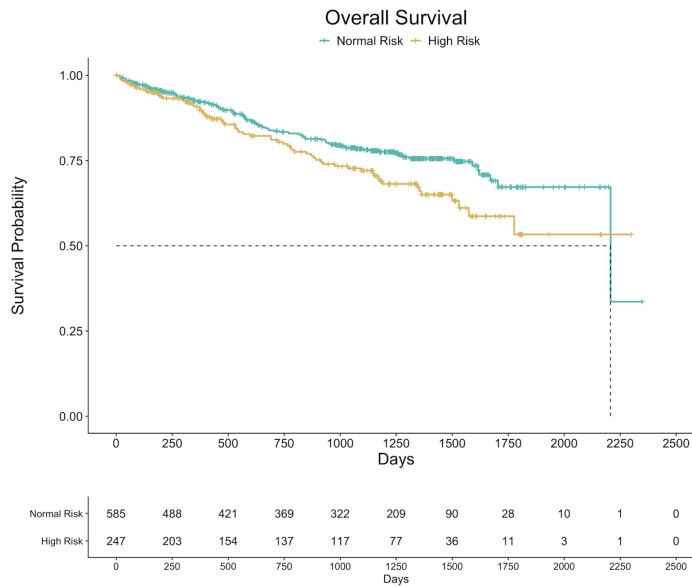

48

49

50 PFS and OS outcomes of CoMMpass patients with high risk molecular features: del17p13, t(14;16) MAF,  
 51 t(14;20) MAFB, t(8;14) MAFA, or t(4;14) WHSC1/MMSET/NSD2. Median PFS for normal-risk and high-  
 52 risk patients was 39 and 31 months respectively. Median OS for normal-risk patients was 73.6 months,  
 53 whereas median OS for high-risk patients was not met as of the IA14 release. Patients with high-risk  
 54 features had poor PFS and OS outcomes ( $p < 0.05$ ) as compared to normal-risk patients.

55 1.3 Baseline Molecular Assay Intersection

RNA --> ( 714 ) | WES-Mut/LoH --> ( 892 )  
WGS-STR --> ( 851 ) | WGS-CNA --> ( 871 )

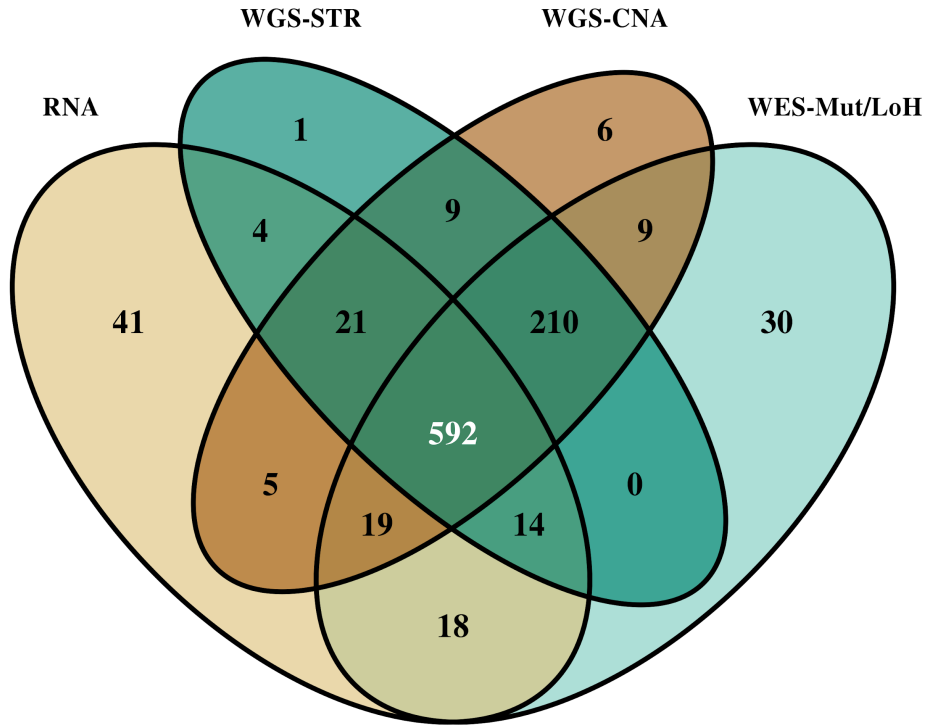

56  
57

58 Venn diagram showing the number of patients in the baseline CoMMpass cohort with available RNAseq,  
59 WGS structural (WGS-STR), WGS copy number (WGS-CNA), and WES mutation and loss-of-  
60 heterozygosity (WES-Mut/LoH) data for bone marrow (BM) derived tumor samples. There were 592 BM-  
61 derived tumor samples that were fully characterized with all data types available for analysis at diagnosis.



## 62 2 Identification of DNA Subtypes of Multiple Myeloma

### 63 2.1 Cluster Number Determination from CN Consensus Clustering

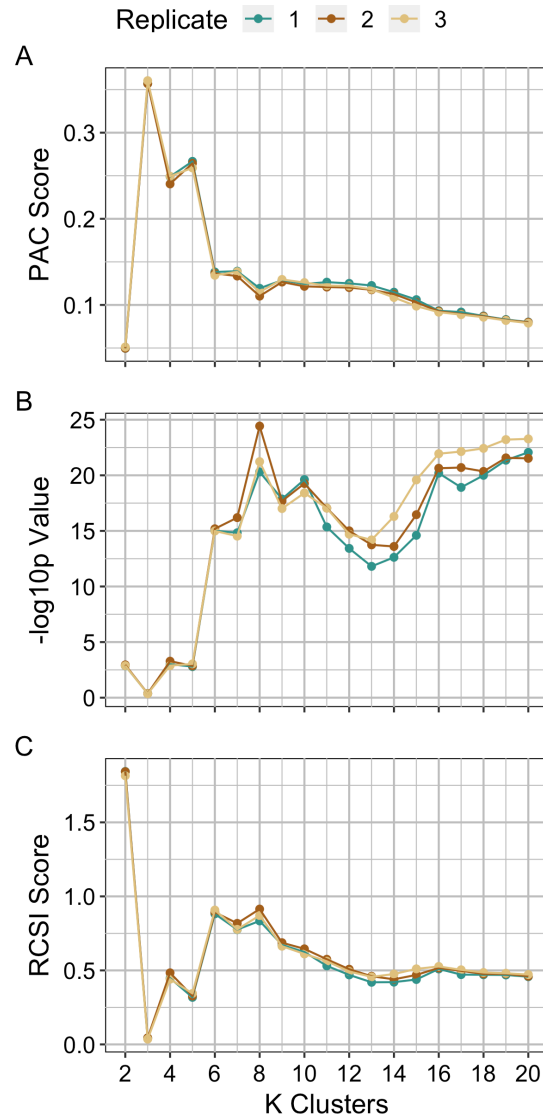

64  
65 Consensus clustering was performed in triplicate using three different seeds and the optimum number of  
66 clusters was determined using M3C. M3C calculates (A) a PAC score, (B)  $-\log_{10}p$  value, and (C) RCSI  
67 score for  $K=2$  to  $\max K$ . A lower PAC score, higher  $-\log_{10}p$  value, and higher RCSI score indicate an  
68 optimal number of clusters. An optimal class number of  $K=2$  is supported by both the PAC score and the  
69 RCSI, with the lowest PAC score and the highest RCSI score across all three replicates, identifying the  
70 two broad HRD and NHRD genetic subtypes of myeloma. However, the p-value for  $K=2$  is among the  
71 lowest when compared to the other clusters. For values of  $K$  greater than 12, the PAC score and p-score  
72 begin to overfit the data, indicated by the downward and upward trend respectively. Within the range of  
73  $K=3-12$ ,  $K=8$  has the lowest PAC score, most significant p value, and a consistently high RCSI score  
74 across all three replicates, indicating  $K=8$  is the optimal cluster number. The class assignments from  
75 replicate 2 were used for all further downstream analyses.

76 2.2 Consistency of Subtype Assignments by CN Clustering

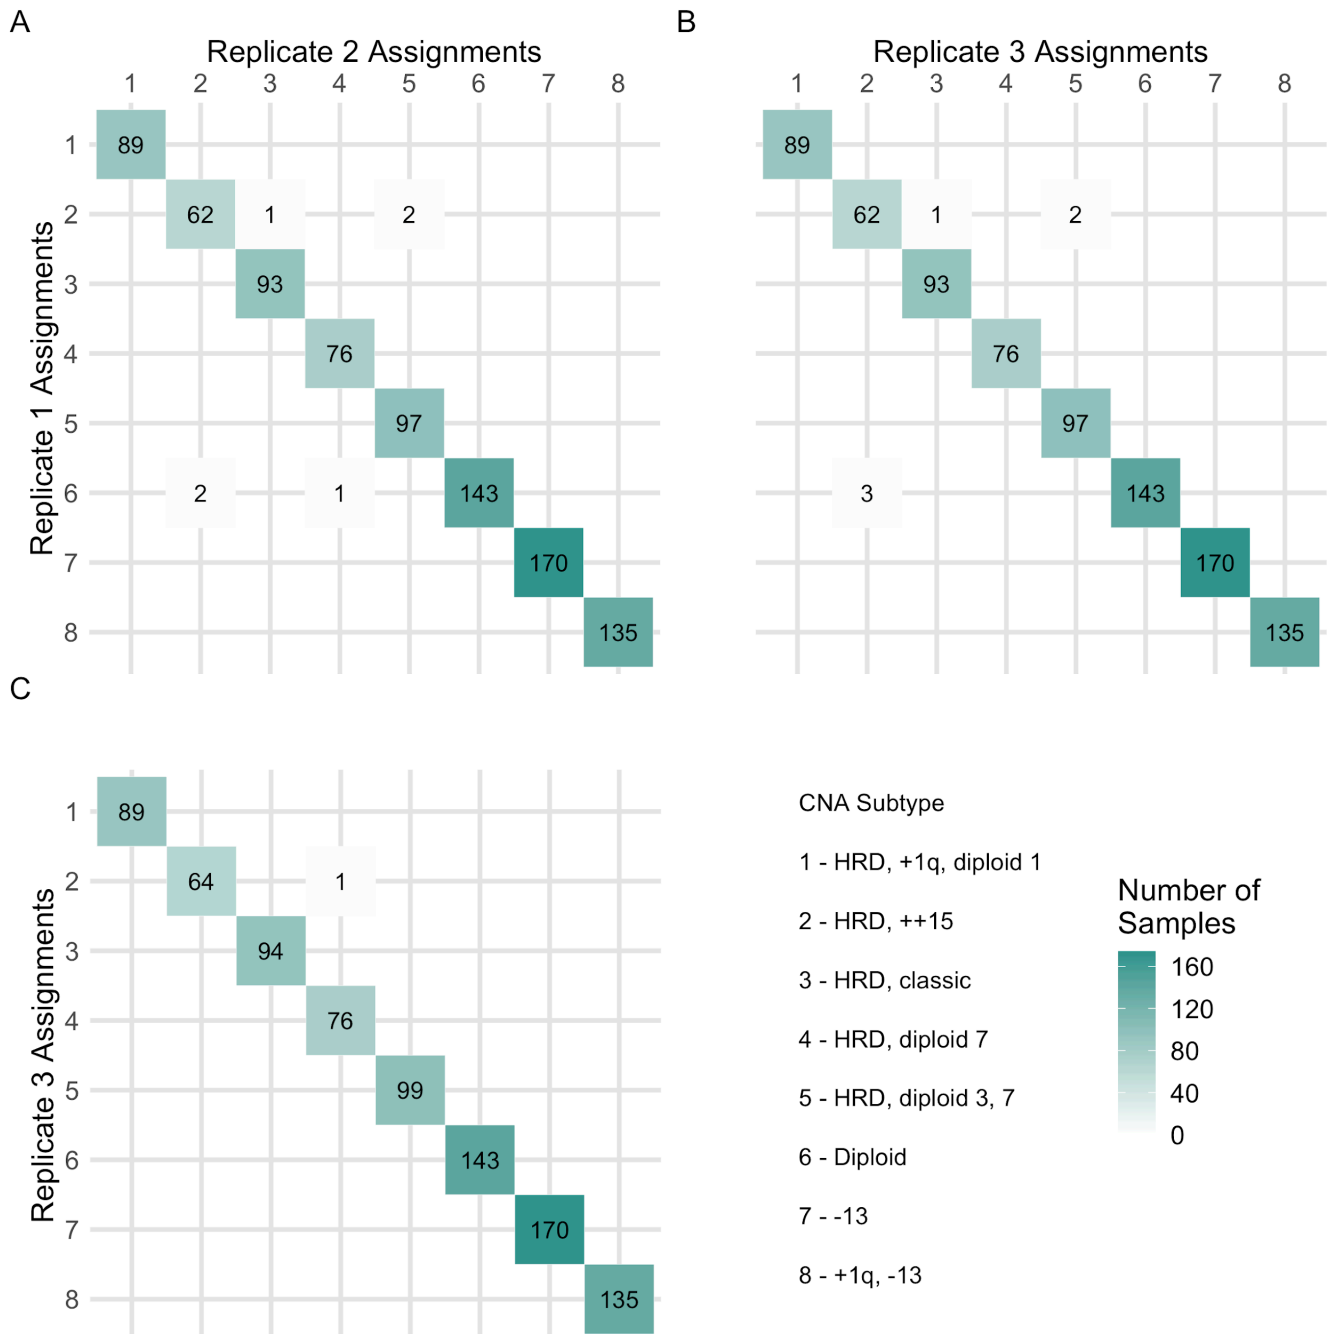

77  
 78 Confusion matrices showing the number of patients classified in each CN subtype across three replicates.  
 79 CN subtype classifications were highly consistent across replicates with only 6/871 (0.7%) patients  
 80 having different CN subtype classifications across replicates (A) 1 and 2 and (B) 1 and 3, and (C) only  
 81 1/871 (0.1%) patients having a different CN subtype classification across replicate 2 and 3.

82 2.3 CN Consensus Clustering Matrix

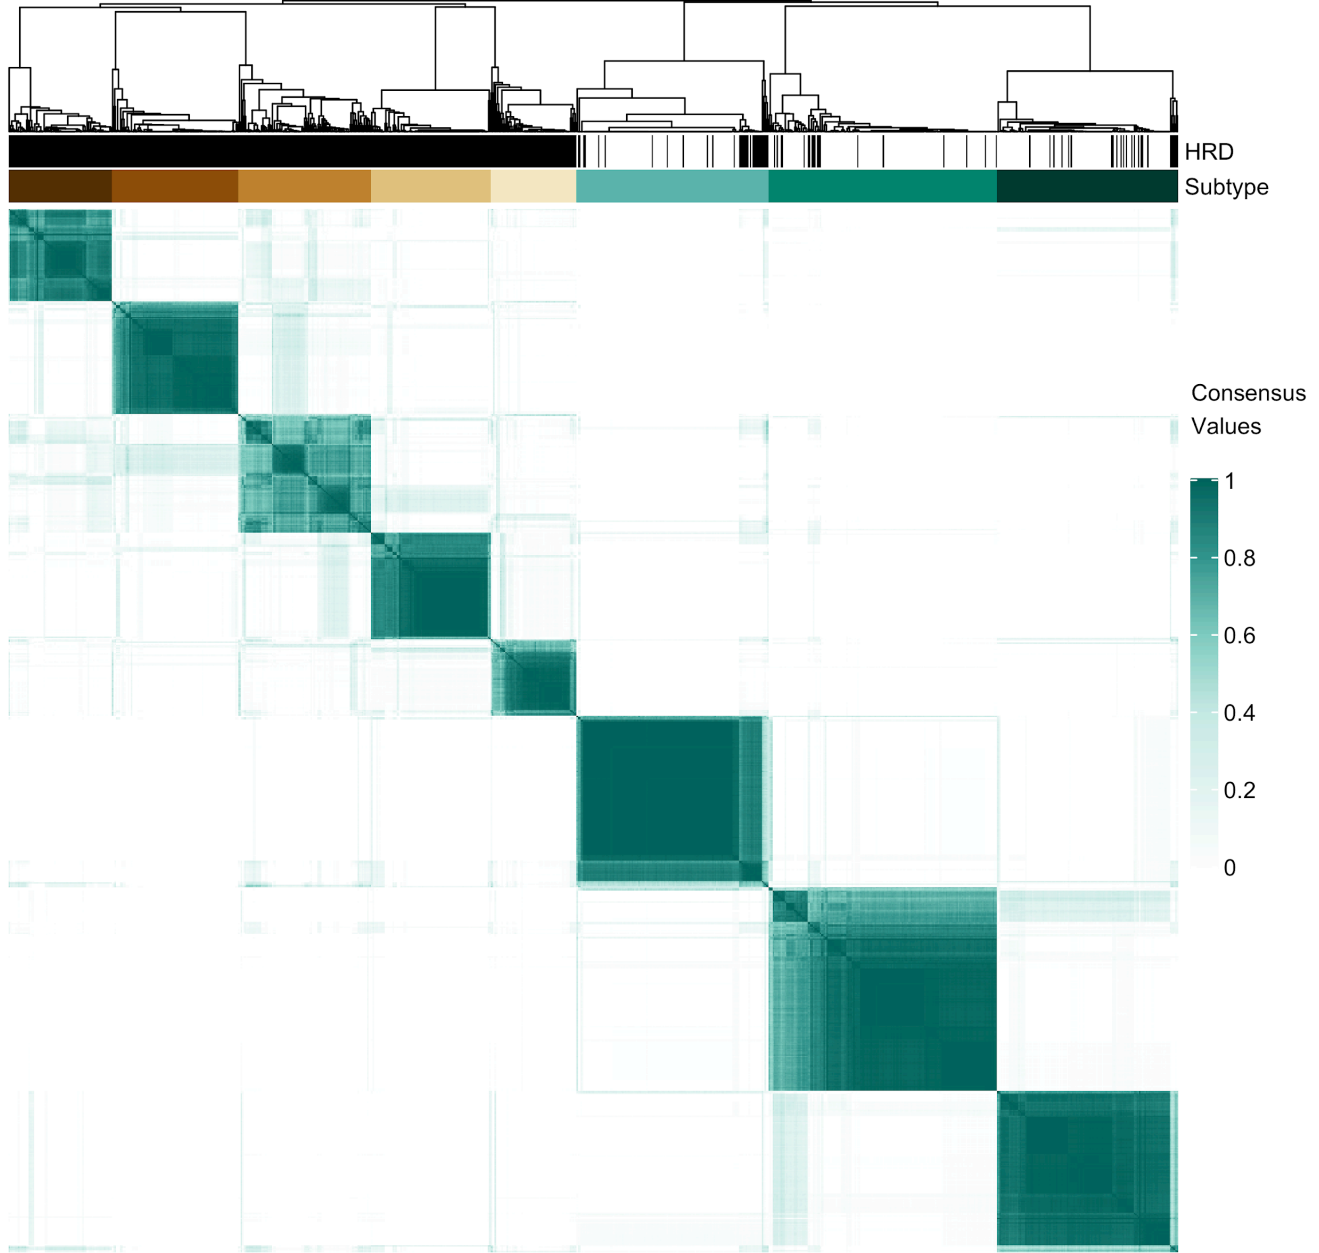

Copy Number Subtype

HRD, +1q, diploid 11,-13  
  HRD, ++15  
  HRD, classic  
  HRD, diploid 7  
  HRD, diploid 3,7  
  Diploid  
  -13  
  +1q,-13

83  
 84 Consensus clustering matrix with an optimal clustering solution of K=8. The M3C (Monte Carlo reference-  
 85 based) consensus clustering algorithm was applied to the CN measurements of 26,771 100Kb intervals  
 86 across the GRCh37 reference genome for 871 WGS BM derived baseline samples. Five of the eight  
 87 subtypes include only samples classified as hyperdiploid.

88 2.4 CN Density Plots for Subtype Defining Events

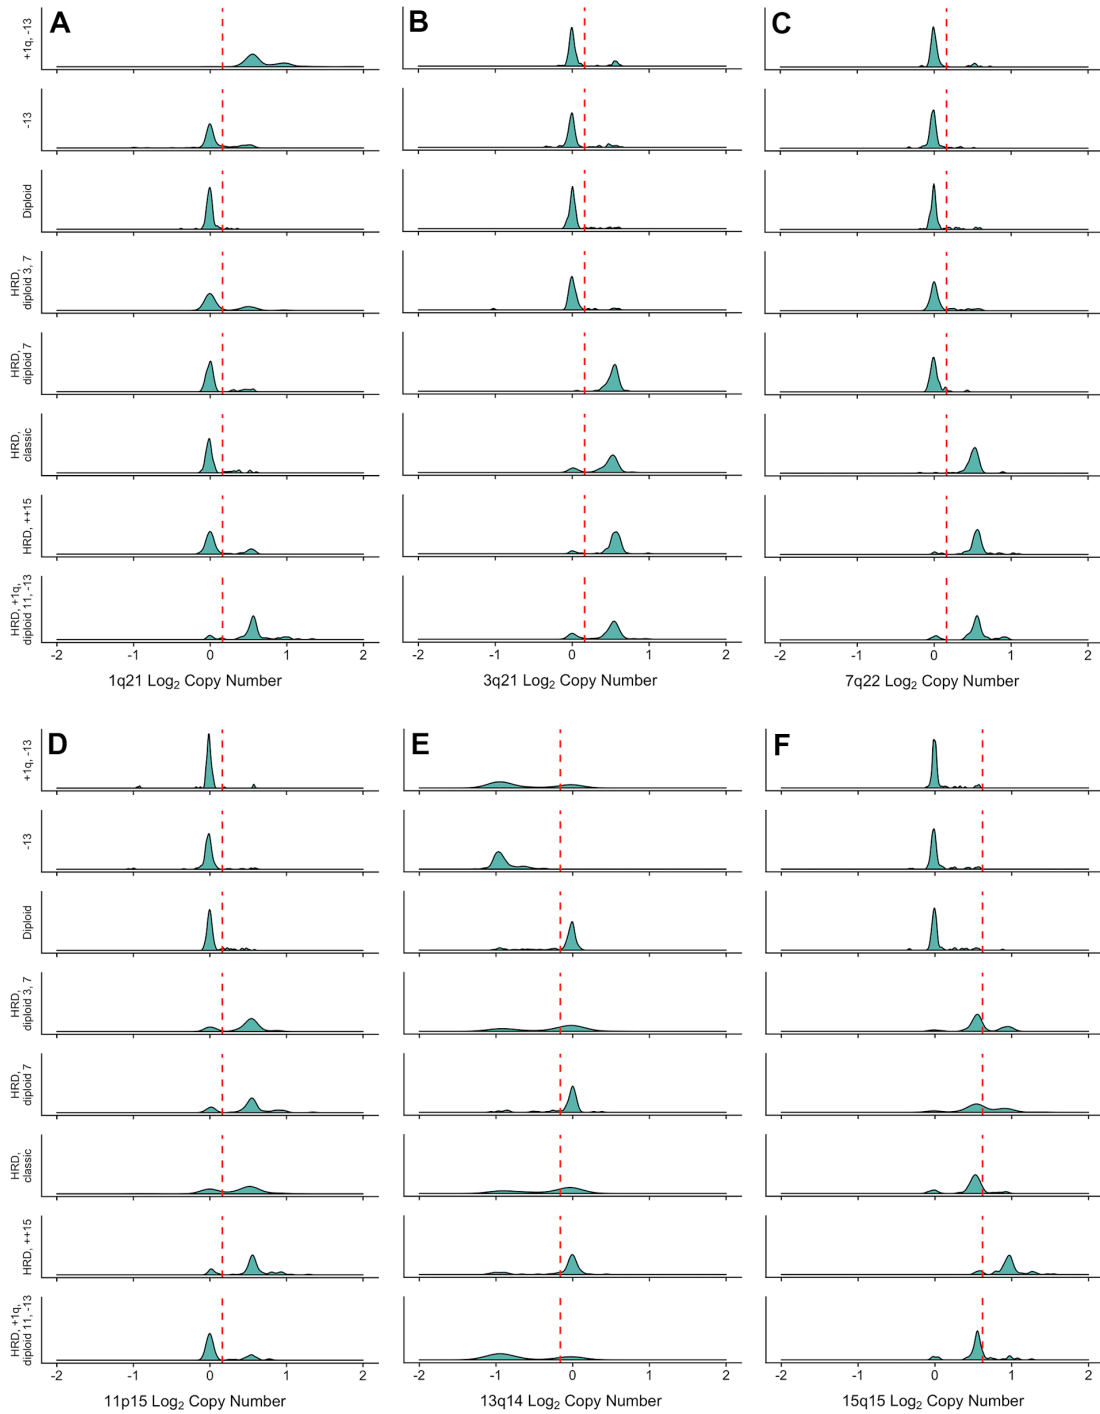

89

90 Copy number (log<sub>2</sub>) density plot across CN subtypes for (A) 1q21, (B) 3q21, (C) 7q22, (D) 11p15, (E)  
 91 13q14, and (F) 15q15. The red dotted line in plots A-D indicates the 1 copy gain threshold, in plot E  
 92 indicates the 1 copy loss threshold, and in plot F indicates the 2 copy gain threshold.

93 2.5 Survival Outcomes for HRD and NHRD Patients

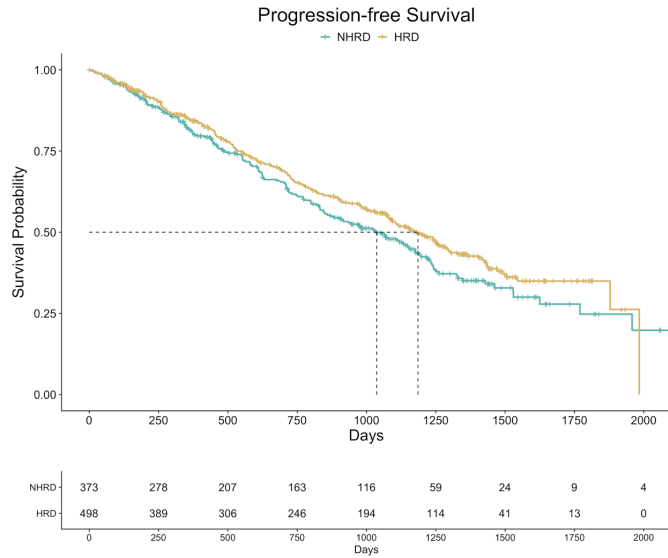

94

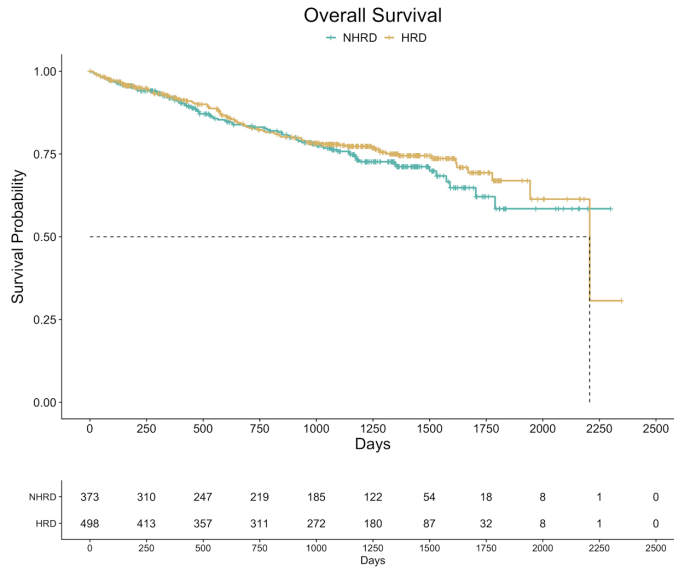

95

96 PFS and OS outcomes for hyperdiploid (HRD) versus non-hyperdiploid (NHRD) CoMMpass patients.

97 There was no significant difference in PFS for HRD (39.5 months) versus NHRD (34.6 months) patients,

98 or OS for HRD (73.6 months) versus NHRD (median OS not met) patients.

99 2.6 Survival Outcomes for Patients with Amp1q and Del13q

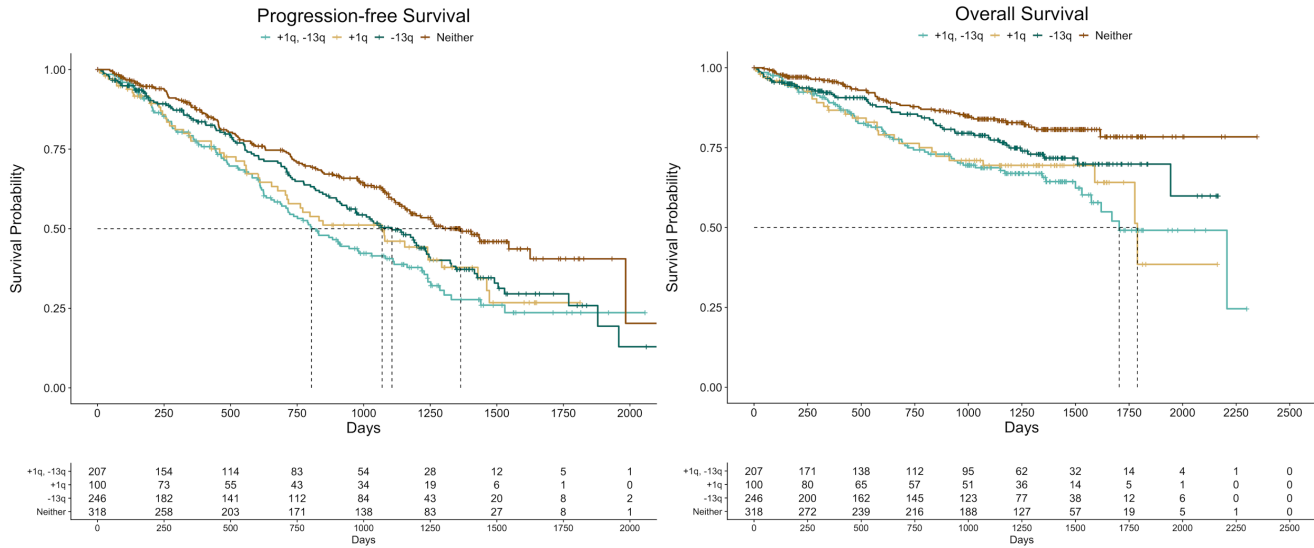

100

Univariate Cox Proportional Hazards Model

| Variable | No. Patients (%) | HR  | 95% CI  | p-value |
|----------|------------------|-----|---------|---------|
| Amp1q    | 307 (35.2)       | 1.8 | 1.4-2.4 | <0.0001 |
| Del13q   | 453 (52.0)       | 1.5 | 1.1-2.0 | 0.0044  |

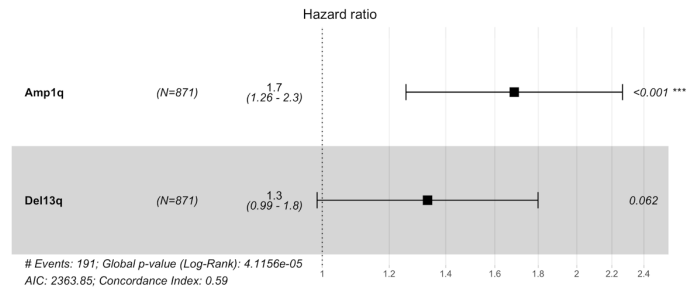

101 PFS (top left) and OS (top right) outcomes for CoMMpass patients with both amp1q and del13q (+1q21,  
 102 -13q14), amp1q alone (+1q21), del13q alone (-13q14), and neither amp1q or del13q (neither). Amp1q  
 103 was defined as a gain of 1 or more copies of 1q21, whereas del13q was defined as a loss of one copy of  
 104 13q14. No difference in PFS or OS outcome was observed between +1q21, -13q14 patients and +1q21  
 105 patients, however patients with +1q21, -13q14 had poor OS outcomes compared to patients with -13q14  
 106 alone (p < 0.05). In a univariate Cox proportional hazards model, both amp1q and del13q were found to  
 107 significantly impact OS outcome (bottom left). However in a multivariate model (bottom right), only amp1q  
 108 was found to have a significant impact on outcome after adjusting for del13q status.

## 109 3 Identification of RNA Subtypes of Multiple Myeloma

### 110 3.1 Cluster Number Determination from Gene Expression Consensus Clustering

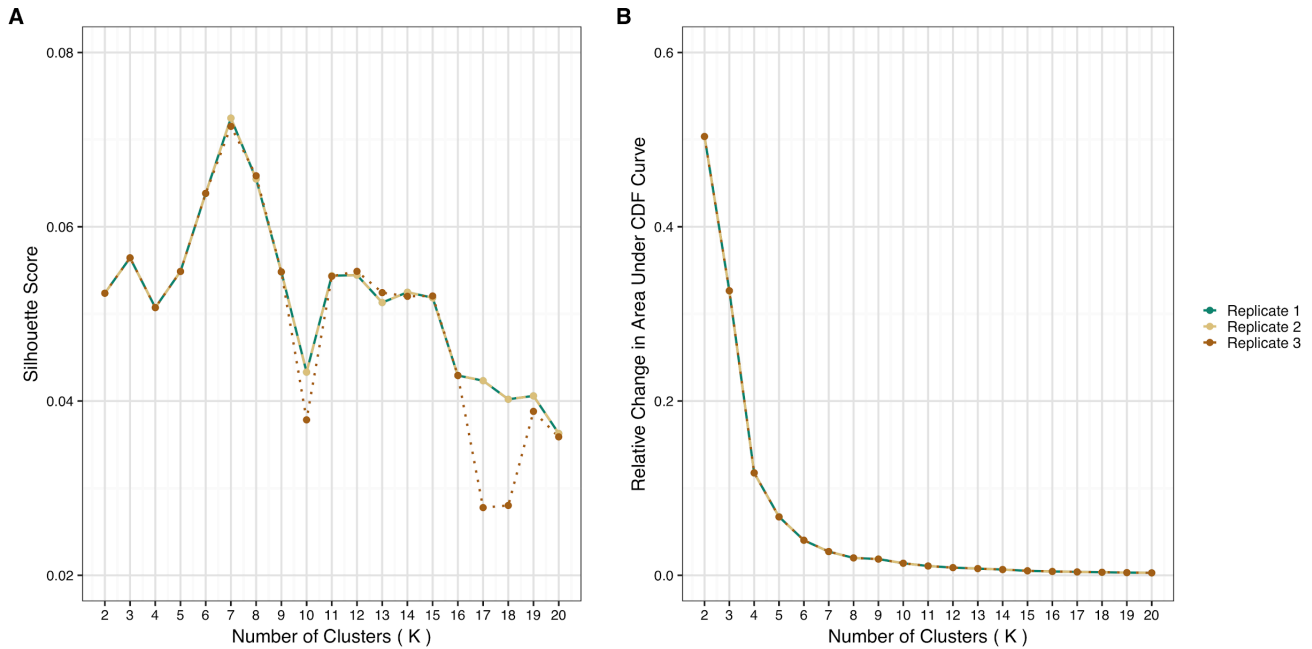

111 For each of the three replicates of consensus clustering, a (A) silhouette score and (B) relative change  
112 in area under the CDF curve was computed for the number of possible clusters tested (K, 2-20). (A) The  
113 silhouette score is defined as the average silhouette width,  $s(x)$ , of all samples in the dataset, where  $s(x)$   
114 is a measure of how appropriately grouped all samples are within a cluster, and the average of all  
115 silhouette widths reflects overall clustering quality. (B) The proportion increase in the CDF area as K  
116 increases,  $\Delta K$ . Ideally, the optimal number of clusters (K) will correspond to the K that maximizes the  
117 silhouette score,  $s(x)$ , while minimizing the  $\Delta K$ . We evaluated the resulting grouping from K = 7-15 based  
118 on the aforementioned criteria ( $s(x)$  score and  $\Delta K$ ) in combination with CoMMpass WGS data and groups  
119 identified in previous studies to identify biologically relevant subtypes. Previous studies identified four  
120 common groups: MS, CD1, CD2, and PR. In our consensus clustering trials, these classes were not  
121 identified until K=11 or greater, in particular, the PR subtype which is the only group with a significant  
122 difference in outcome. We ultimately selected K=12, as it had the highest  $s(x)$  while minimizing  $\Delta K$   
123 when compared to other local maximums of  $s(x)$ . K=9 was eliminated because one cluster only contained 2  
124 patients, and similarly K=10 contained a cluster with only 1 patient, resulting in spurious groups that were  
125 not informative of myeloma biology.  
126

127 3.2 Consistency of Subtype Assignments by RNA Expression Clustering

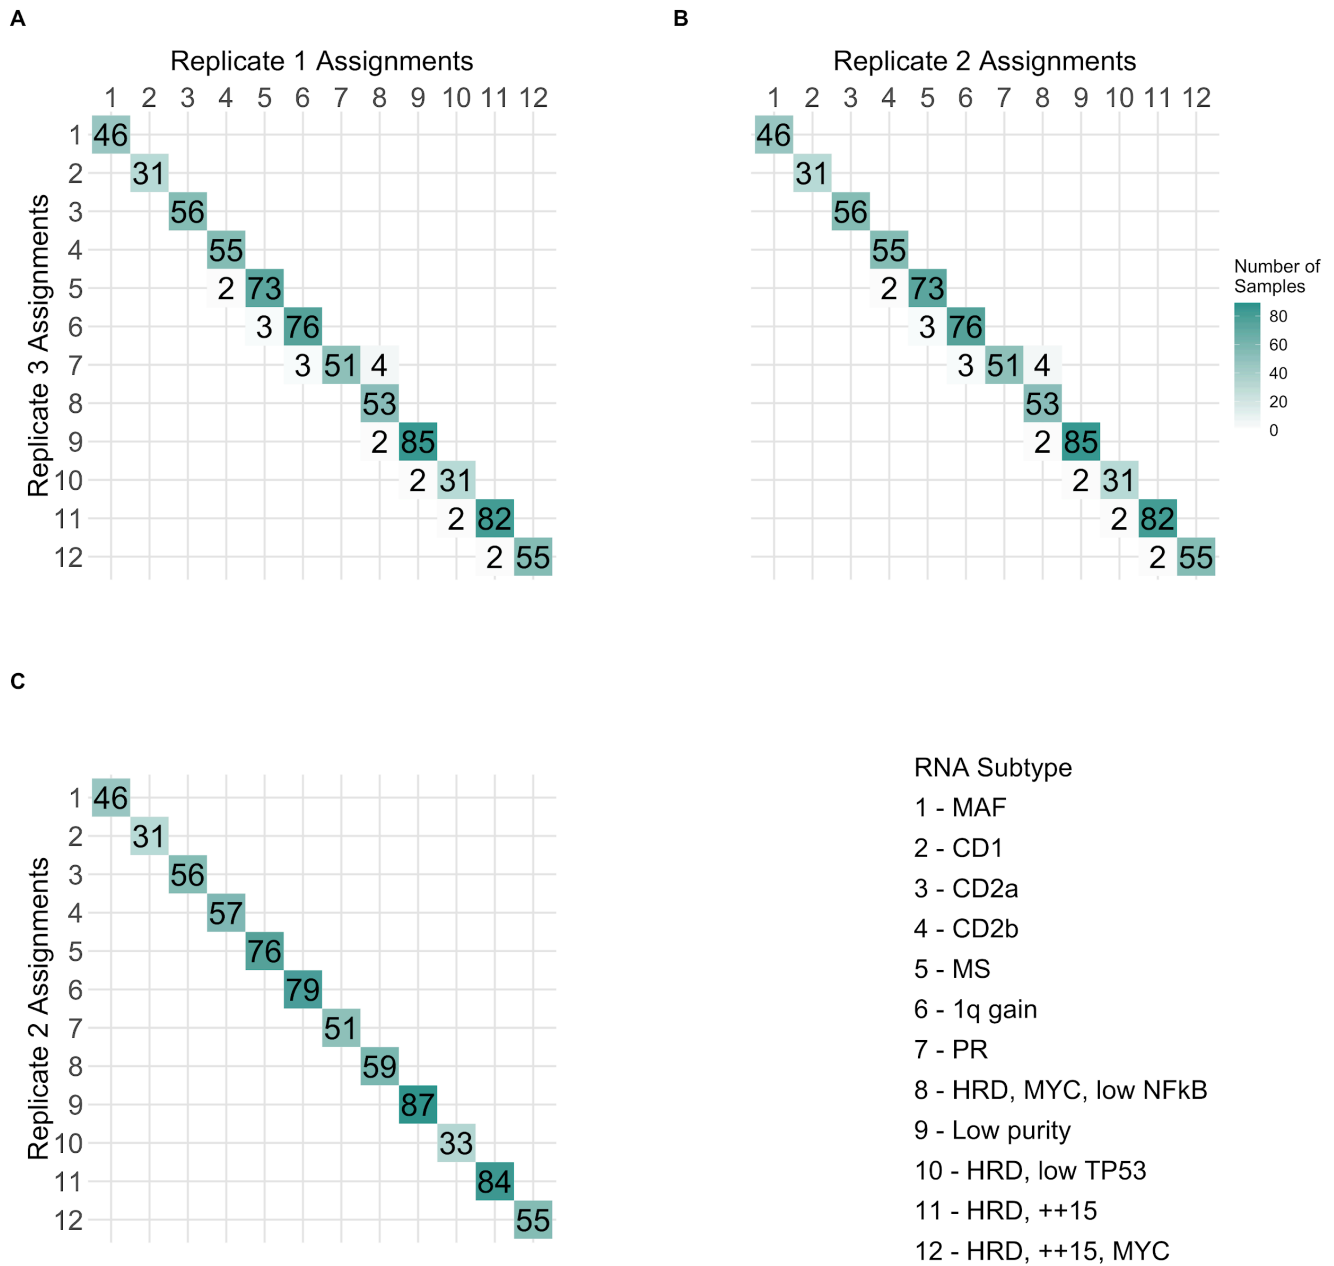

128  
129

130 Confusion matrices of the number of patients classified in each RNA subtype across three replicates. (C)  
131 Replicate 1 and 2 produced identical cluster assignments for all 714 samples. (A-B) 20 samples (2.8%  
132 of the total dataset) from replicate 3 were discordant from their assignments in replicates 1 and 2.



133 3.3 RNAseq Consensus Clustering Matrix

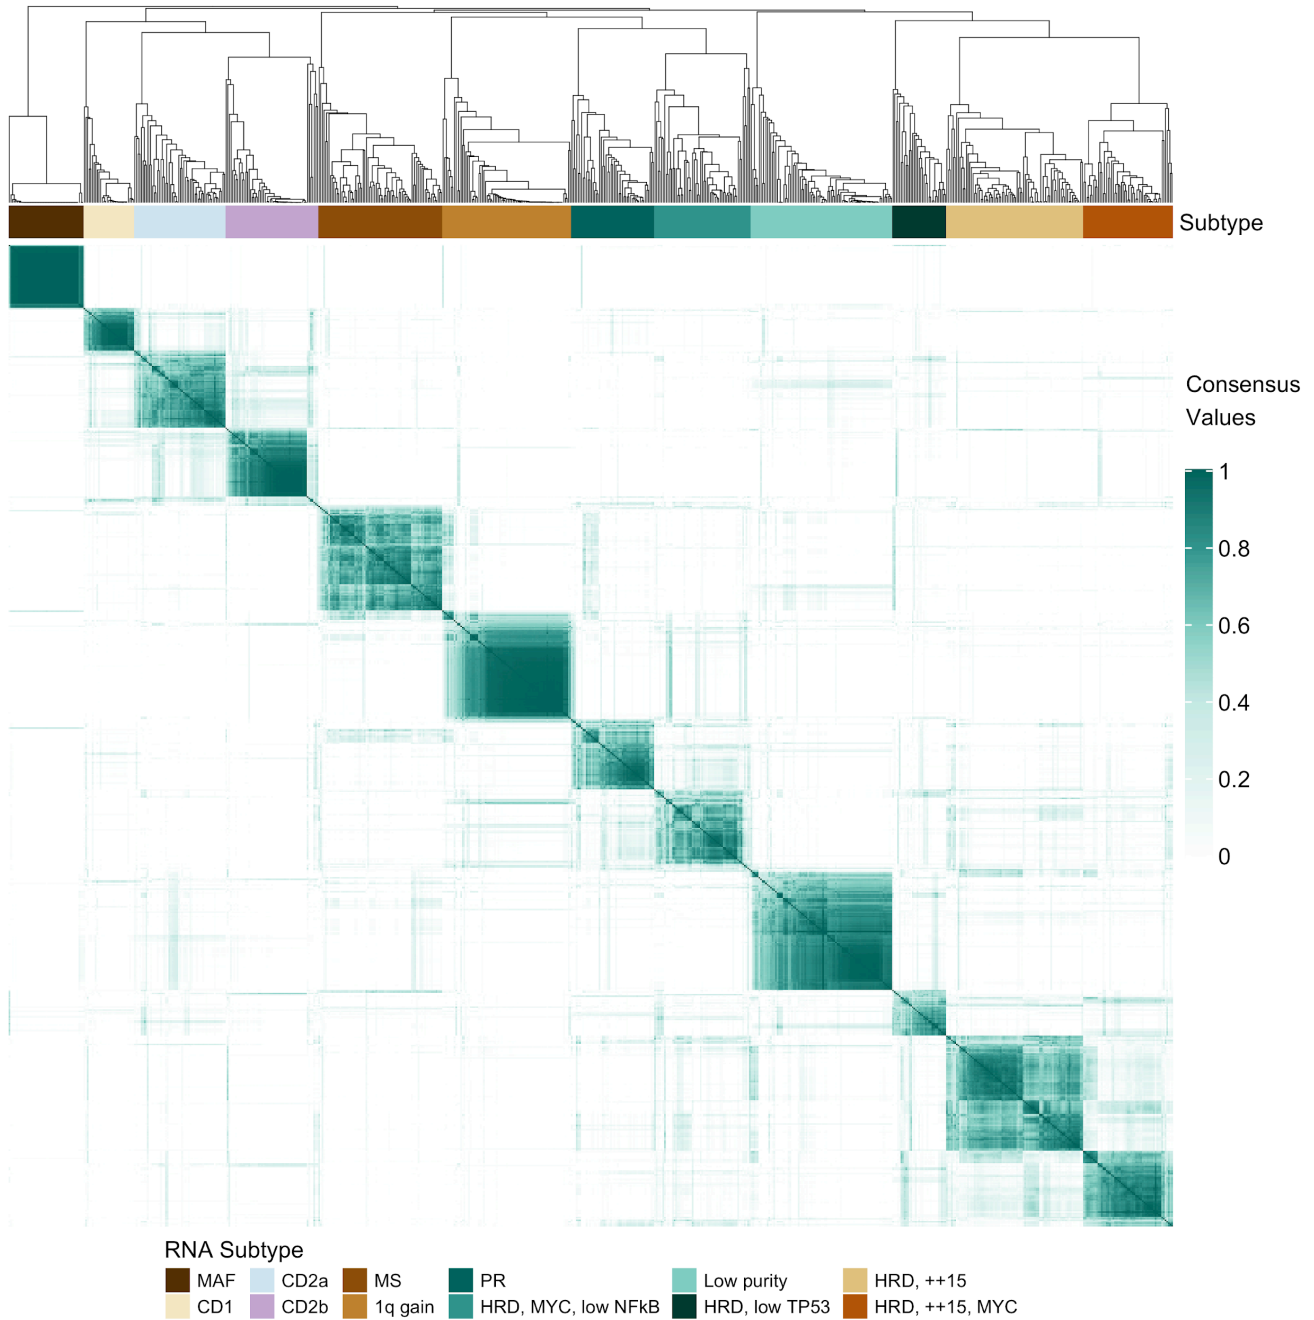

134  
135  
136

Consensus matrix showing the consistency of class assignment for K=12 clustering of RNA-seq data derived from 714 BM baseline samples and 4811 feature-selected genes.

137 3.4 RNA Subtypes and Association with Copy Number

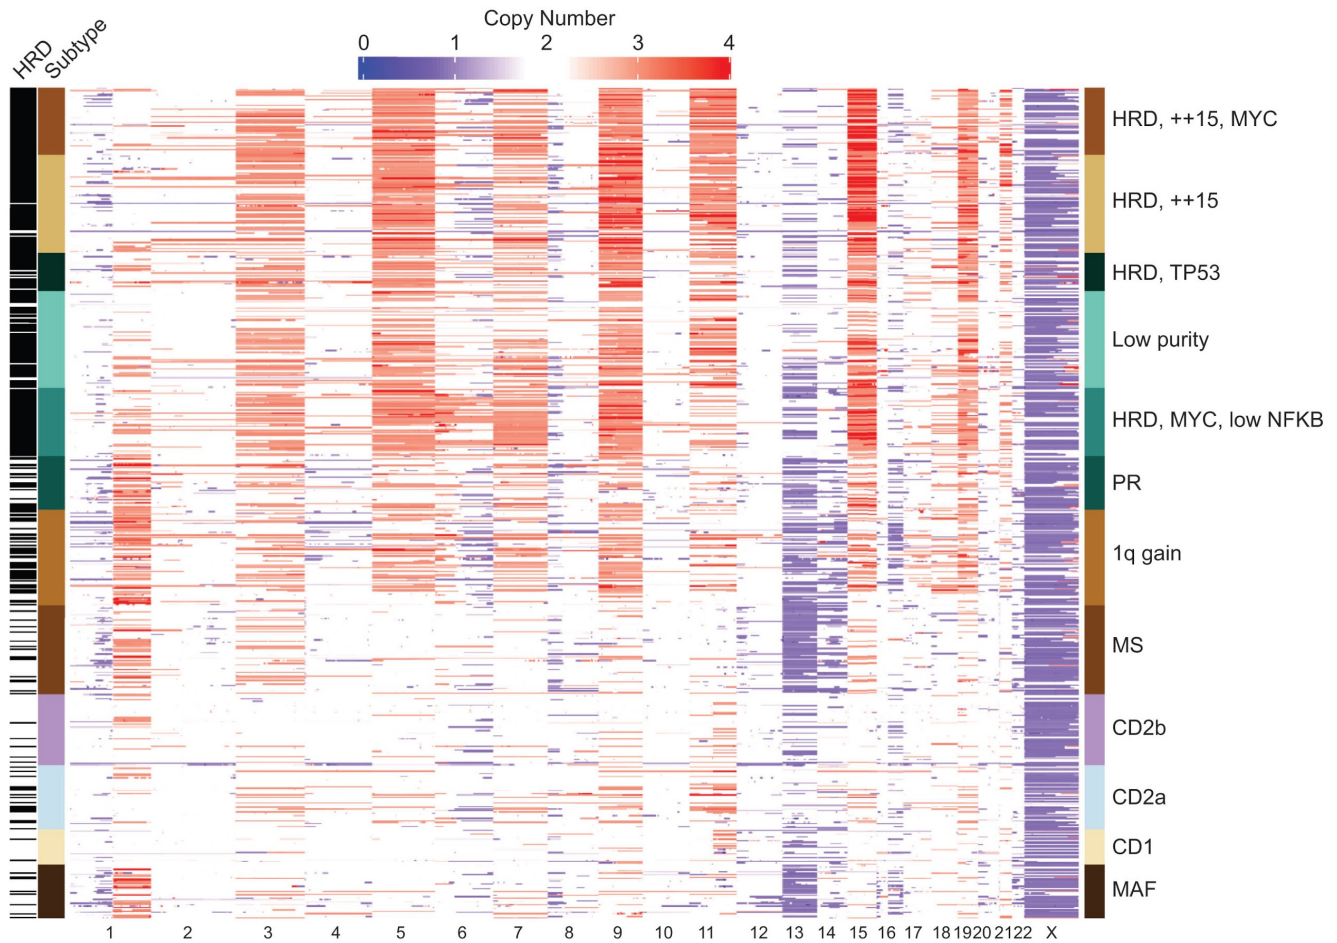

138

139

140 Copy number states for patients by RNA subtype are shown. Diploid copy number is represented as 2  
 141 (white), copy loss is shaded blue, and copy gain is shaded in red. Rare copy number values exceeding  
 142 4 are represented as a copy number value of 4 to maintain uniformity in the heatmap scales for gain and  
 143 loss.

144 3.5 Relationship between CoMMpass and Zhan et al. Expression Subtypes

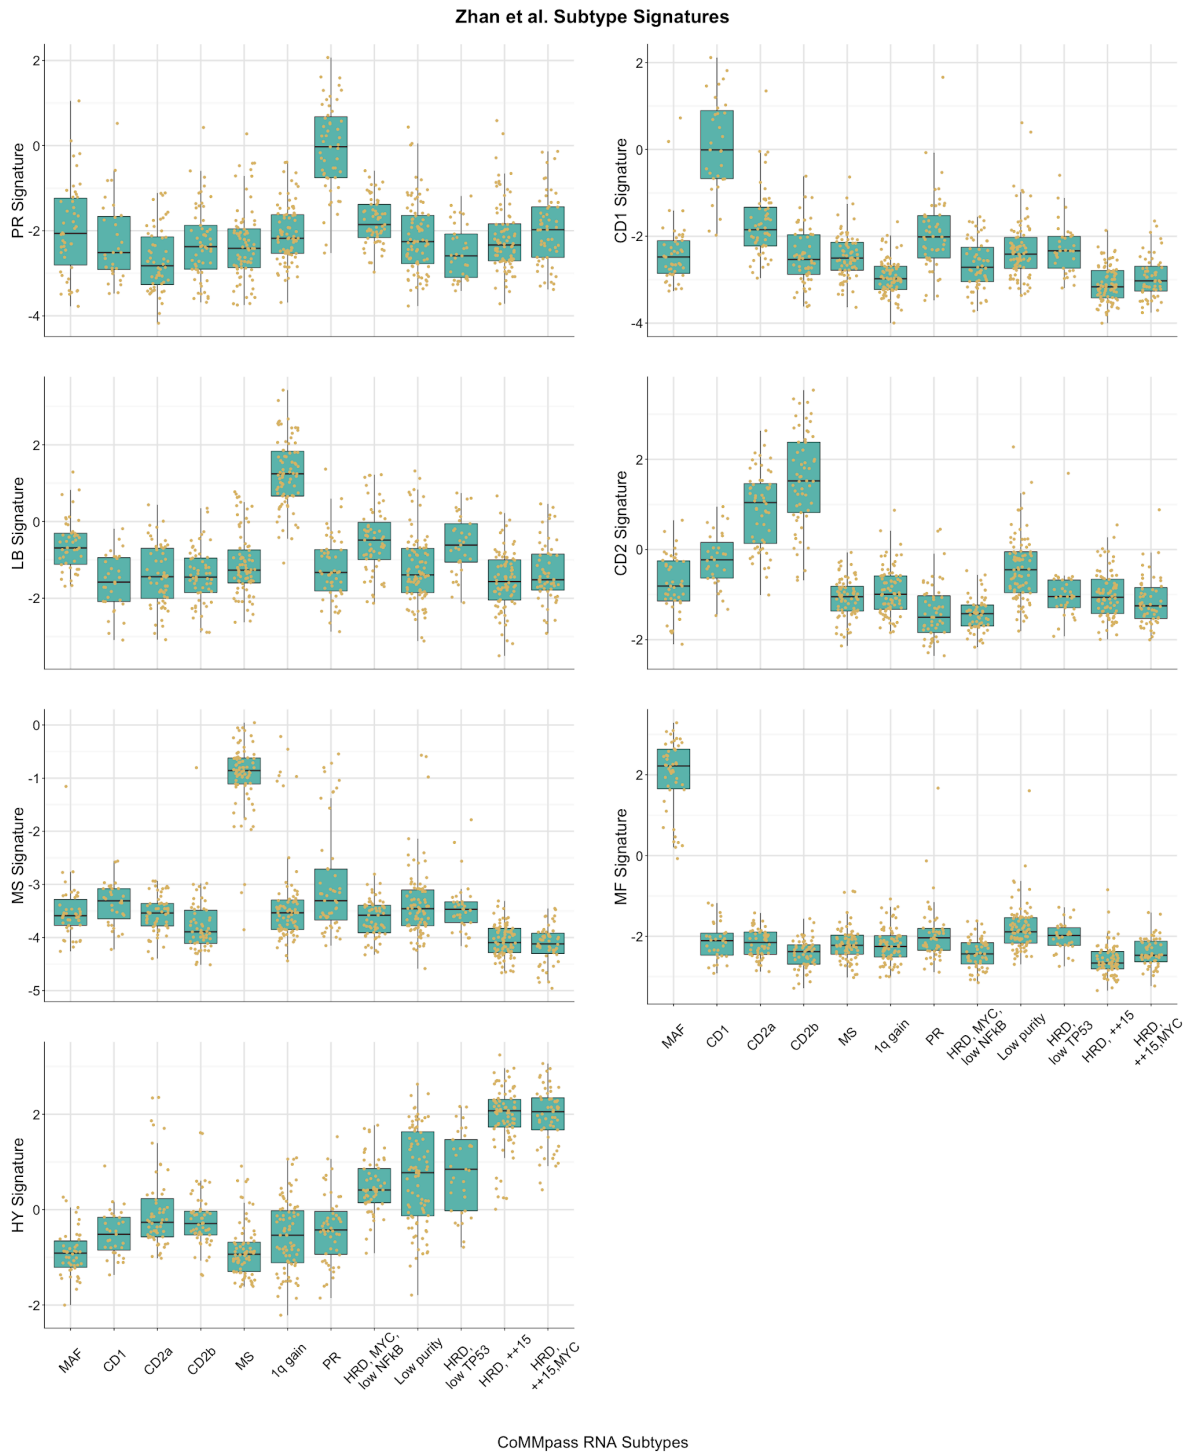

145  
 146 Index values for each of the 7 subtypes defined by Zhan et al.<sup>17</sup> were calculated for each patient and  
 147 compared to the CoMMpass RNAseq native subtype assignments. The distribution of index values  
 148 between the Zhan et al. subtypes and each identified CoMMpass subtype was used to identify related  
 149 subtypes.

150 3.6 Relationship between CoMMpass and Broyl et al. Expression Subtypes

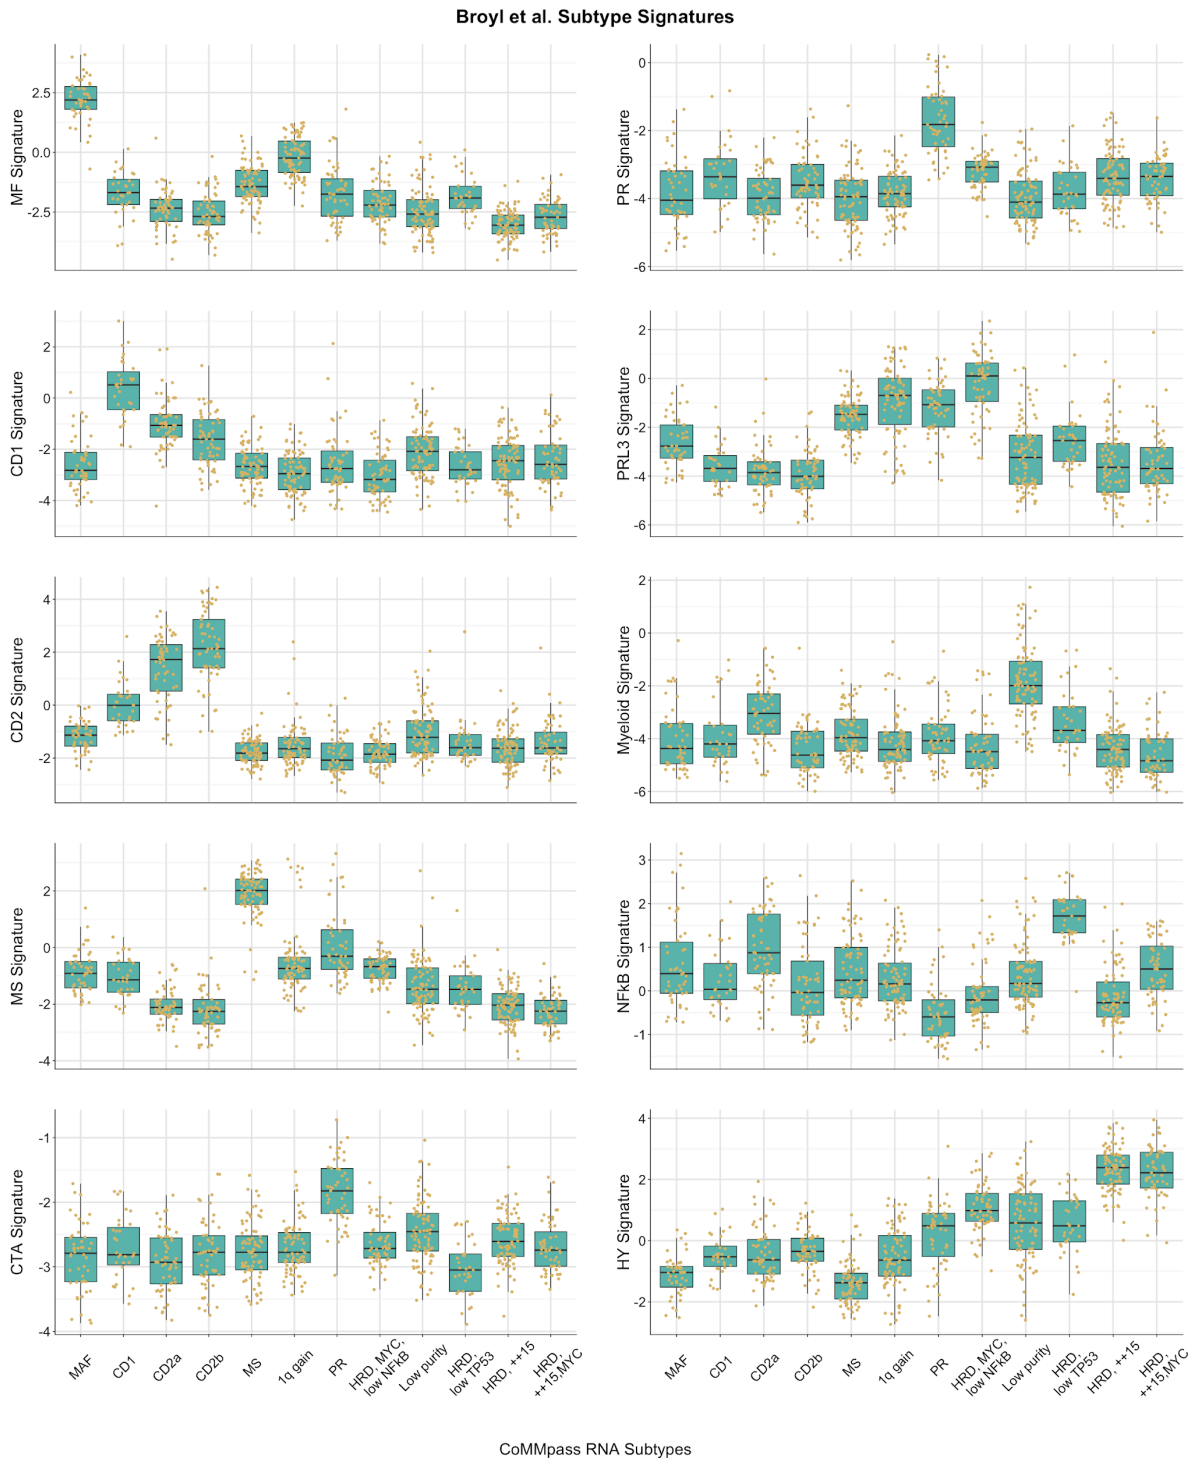

151

152 Index values for each of the 10 subtypes defined by Broyl et al.<sup>18</sup> were calculated for each patient and  
 153 compared to the CoMMpass RNAseq native subtype assignments. The distribution of index values  
 154 between the Broyl et al. subtypes and each identified CoMMpass subtype was used to identify related  
 155 subtypes.

156 3.7 CCND1/2/3 and PAX5 Expression Across RNA Subtypes

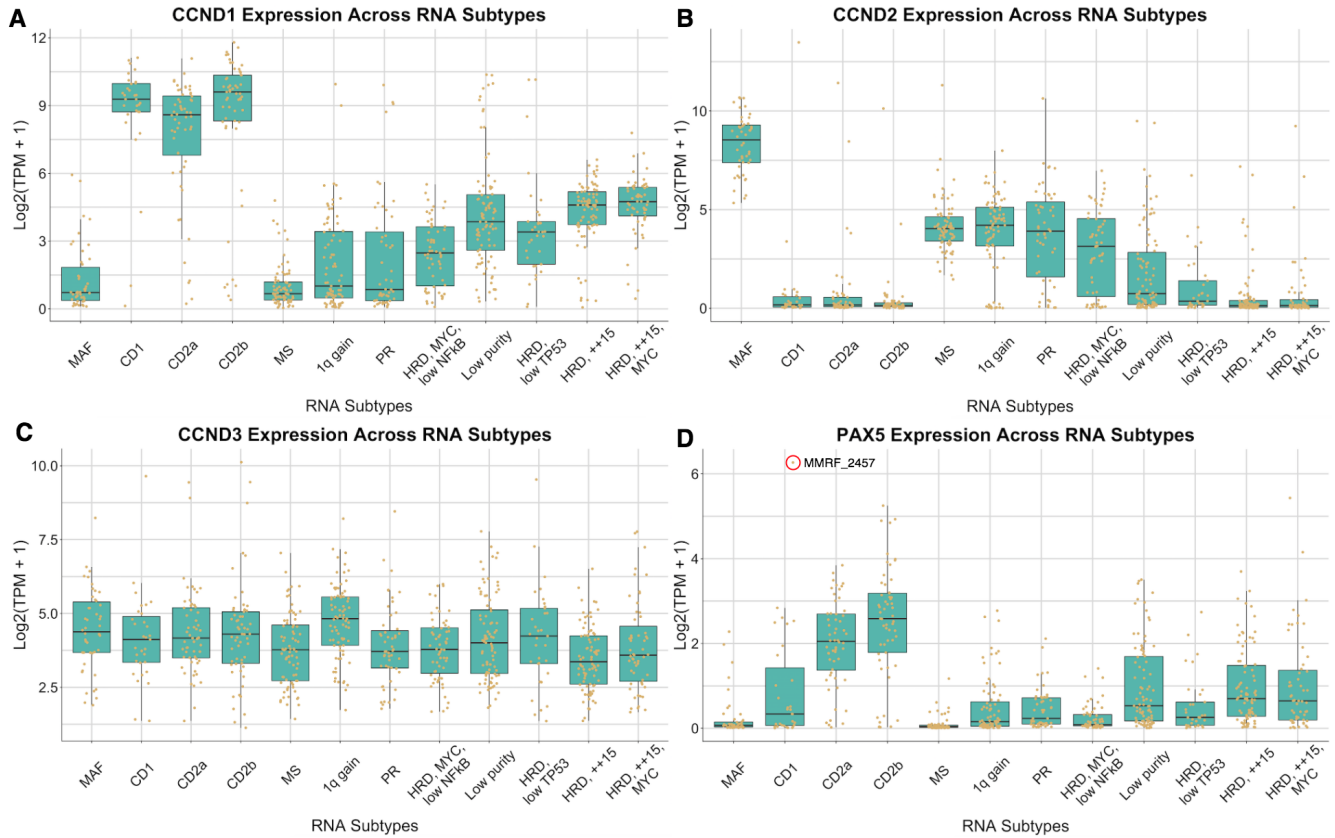

157

158 (A) CCND1, (B) CCND2, (C) CCND3, and (D) PAX5 expression across RNA subtypes. Patients (brown  
 159 dots) in the CD1, CD2a, and CD2b subtypes typically had overexpression of CCND1, CCND2, or CCND3  
 160 due to canonical immunoglobulin translocations targeting these genes. In MMRF\_2457 (red circle), a  
 161 translocation involving CCND1/2/3 was not identified, however, this patient had a t(9;14) resulting in  
 162 overexpression of PAX5. Notably, the CD2a and CD2b subtypes had the highest median expression of  
 163 PAX5 across RNA subtypes.

164 3.8 Relationship between Proliferation Index and CoMMpass Subtypes

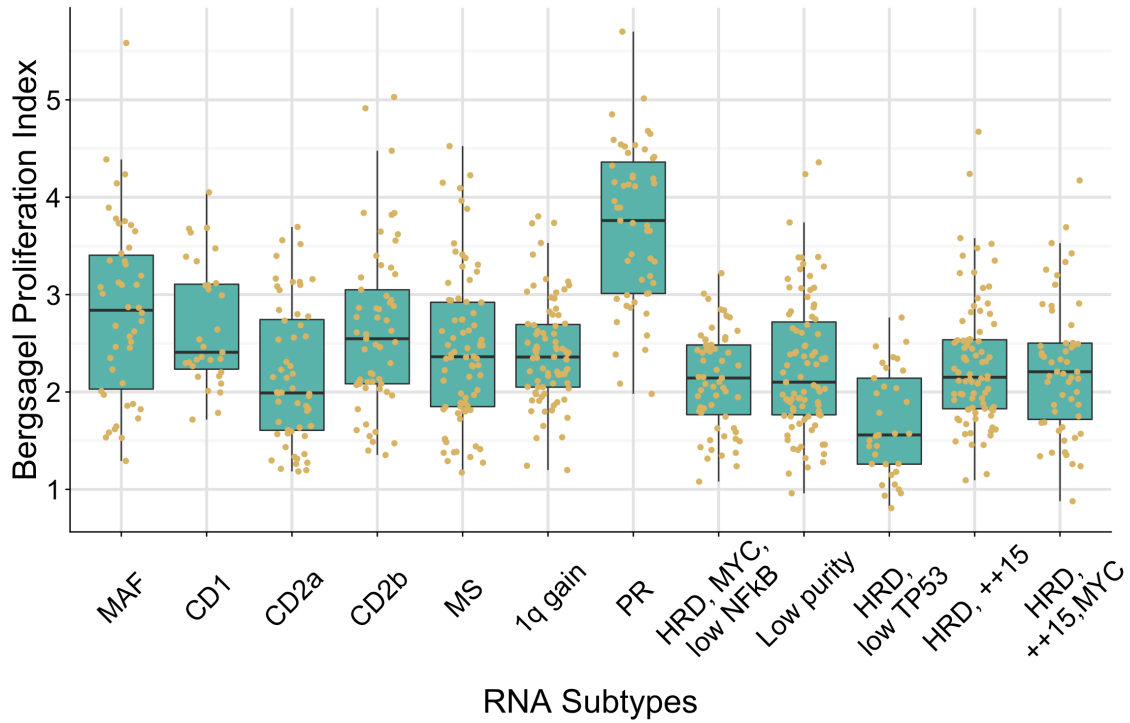

165  
166 The association with an RNAseq defined proliferation index and CoMMpass subtypes is shown. The  
167 Bergsagel Proliferation Index<sup>28</sup> for each sample was determined by calculating the geometric mean  
168 expression of 12 genes (TYMS, TK1, CCNB1, MKI67, KIAA101, KIAA0186, CKS1B, TOP2A, UBE2C,  
169 ZWINT, TRIP13, KIF11). The PR subtype had the highest median proliferation index score.

170 3.9 Prevalence of Bone Disease Across RNA Subtypes

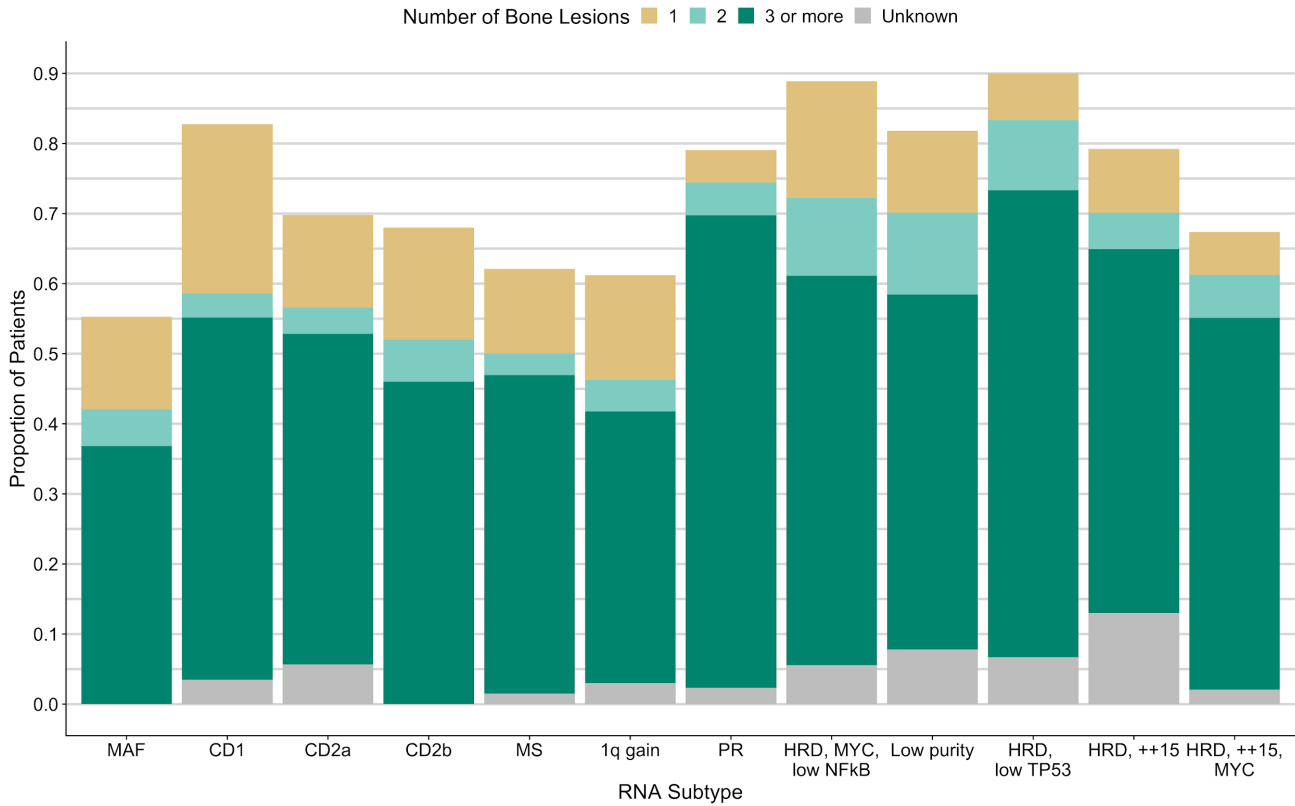

171

172 Proportion of patients in each RNA subtype with bone disease. The proportion of patients with 1, 2, or 3  
 173 or more bone lesions for each subtype is also shown. The Unknown (gray) category represents patients  
 174 with bone disease for whom the number of lesions was not specified.



175 3.10 NFkB Index Distribution by RNA Subtype

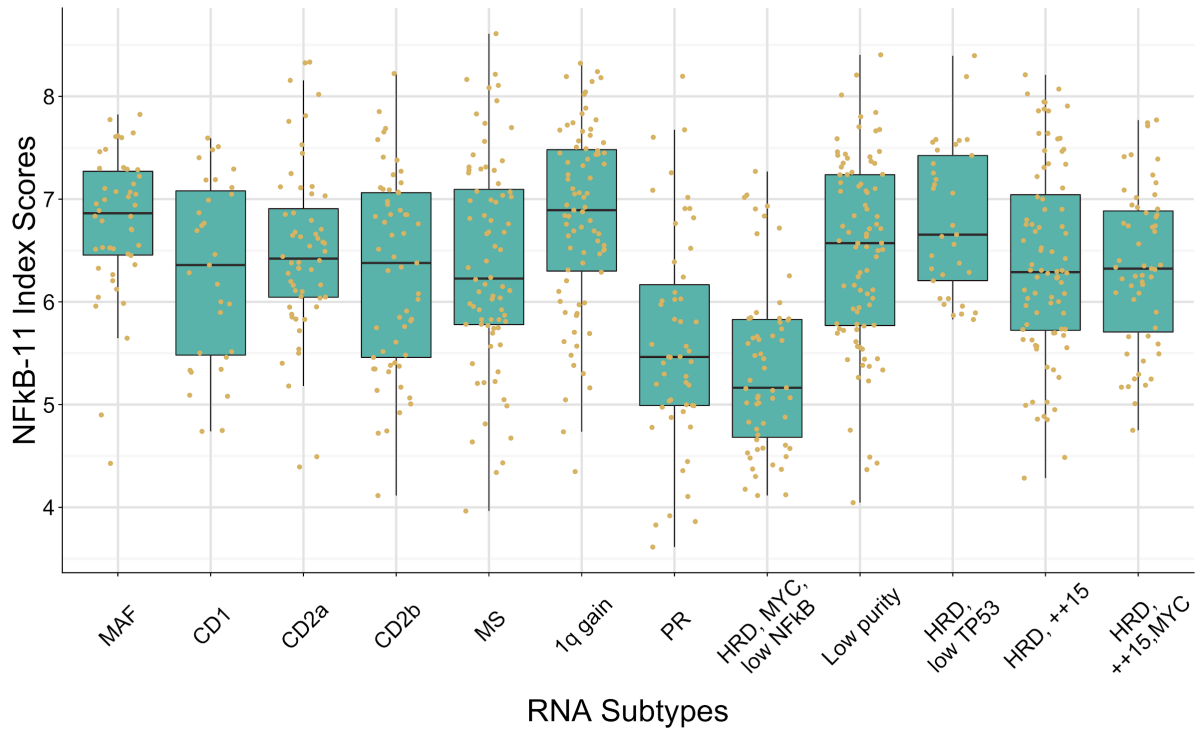

176

177 The association with an RNAseq defined NFkB index and the CoMMpass subtypes is shown. The  
178 NFkB(11) index for each sample was determined by calculating the geometric mean expression of 11  
179 genes (BIRC3; TNFAIP3; NFkB2; IL2RG; NFkB1; RELB; NFkBIA; CD74; PLEK; MALT1; and  
180 WNT10A)<sup>36,37</sup>.



181 3.11 NINJ1 and TP53 Expression Across RNA Subtypes

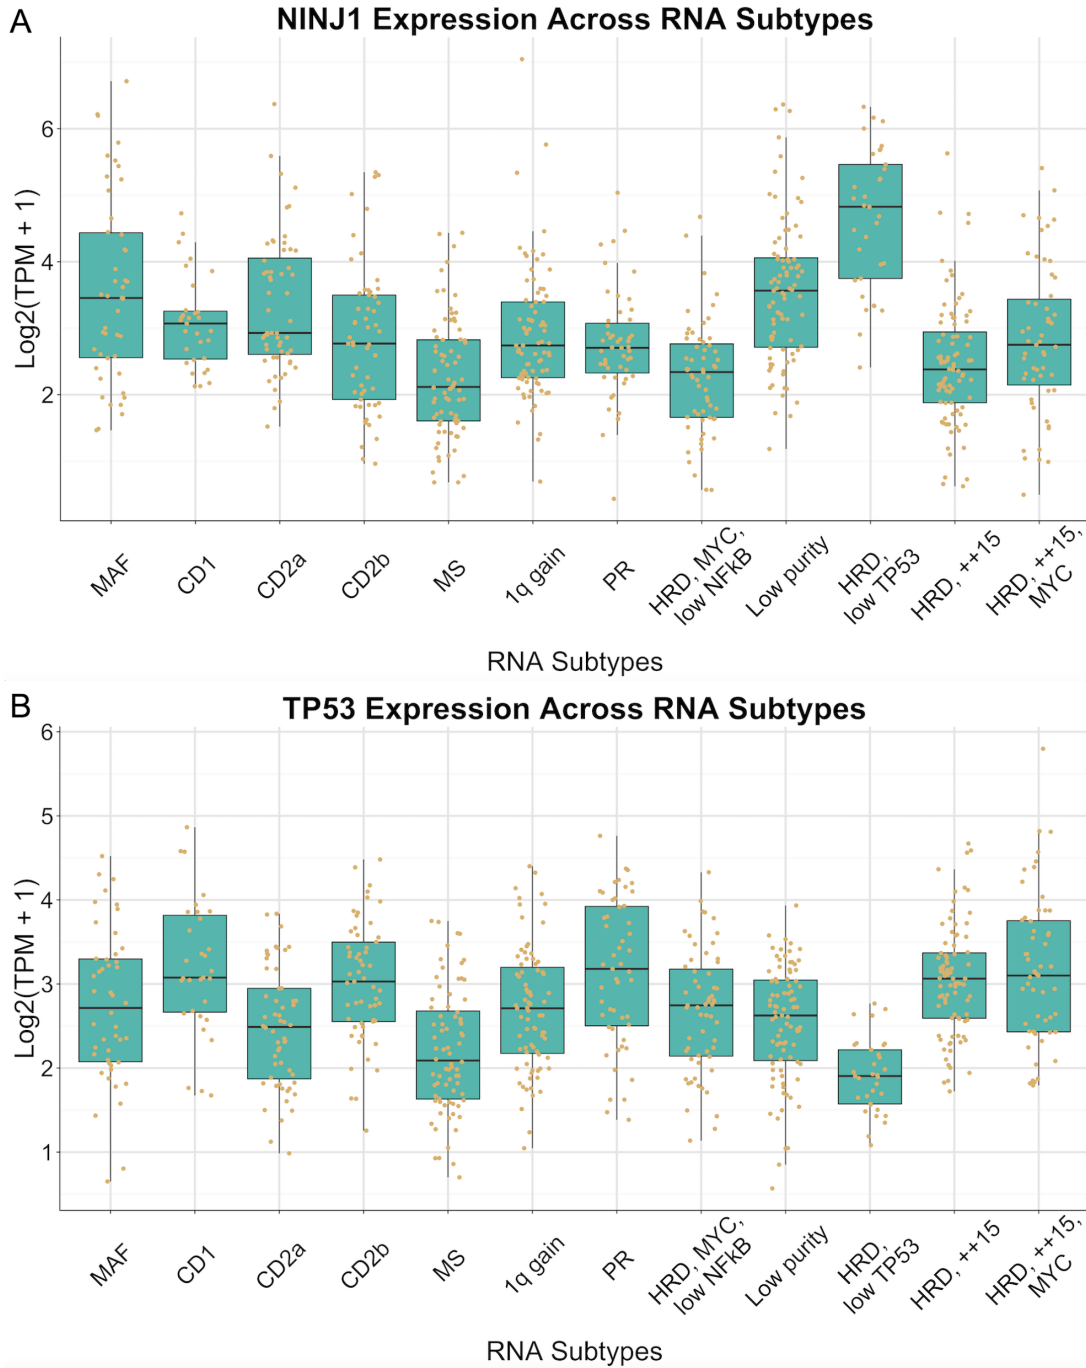

182

183 The expression of (A) NINJ1 and (B) TP53 is shown for each CoMMpass RNA subtype.

184 3.12 Low Purity Association with Low Purity Metrics

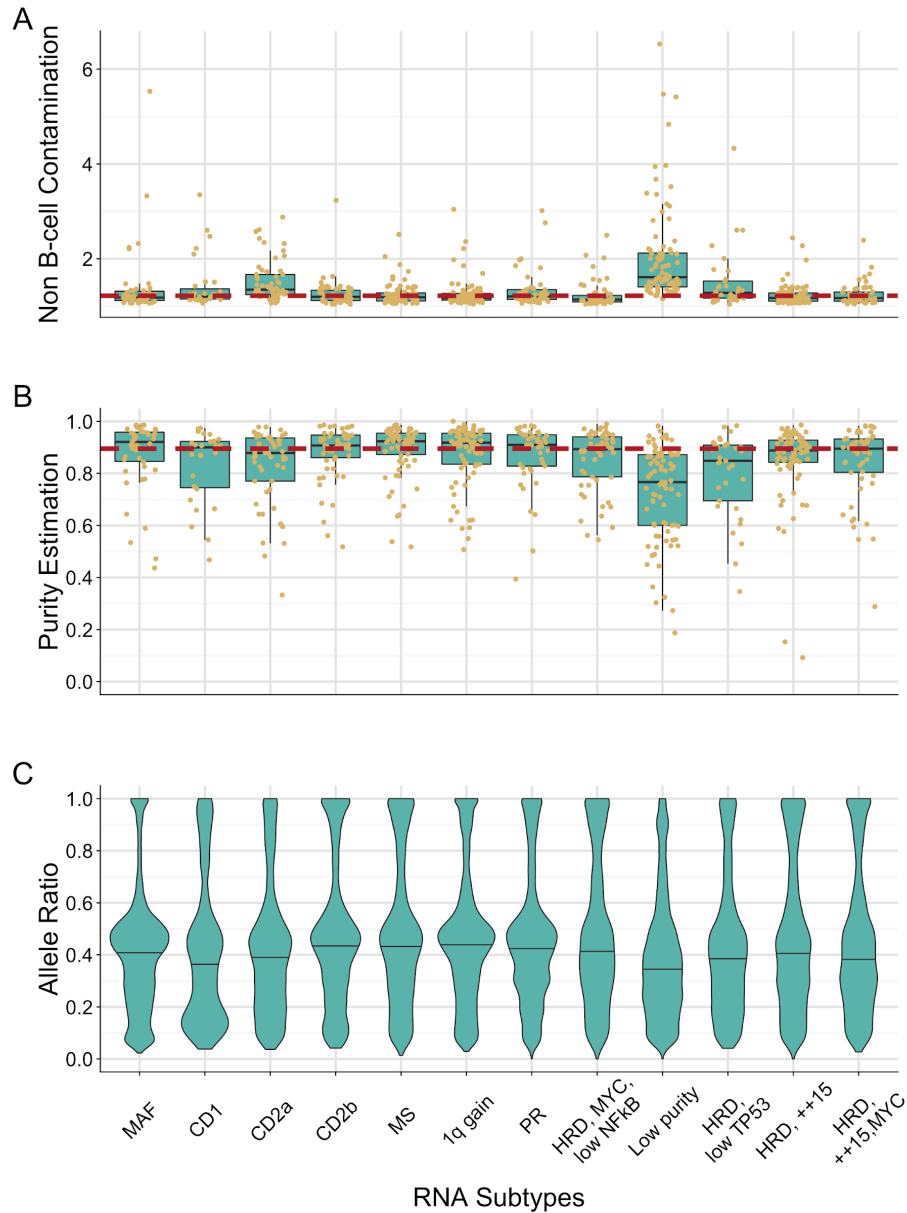

185  
 186 The low purity RNA subtype was defined based on an association of the samples in this category with  
 187 multiple independent measures of sample purity. (A) An index associated with genes expressed in non  
 188 B-cell tissues was used to identify samples with contamination of non-B lineage cells in the CD138<sup>+</sup>  
 189 enriched cell fractions. (B) Tumor purity estimated from the exome copy number or mutation data based  
 190 on the absolute allele frequency of constitutional variants in deletion regions or somatic SNV allele  
 191 frequency in diploid regions of the genome when no usable deletions were detected in the tumor. (C)  
 192 Distribution of observed somatic SNV allele frequencies.

193 **4 Clinical and Molecular Associations with RNA Subtypes**

194 **4.1 Mechanisms of RB1 Complete Loss at Diagnosis**

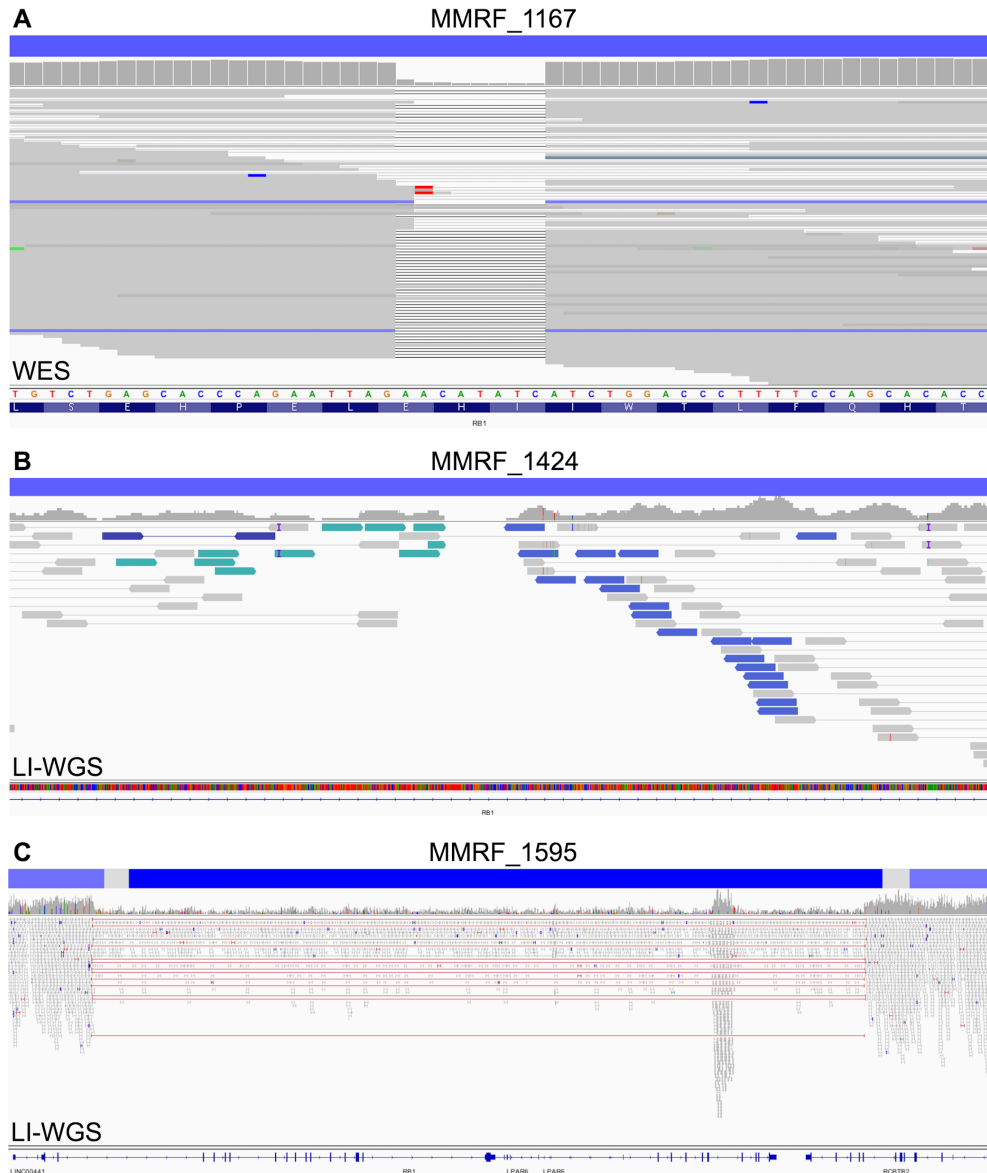

195  
196 Different mechanisms of complete loss of RB1 are observed in tumors of the PR RNA subtype, but  
197 generally involve a one copy deletion of 13q coupled with a second molecular event. Panels A-C show  
198 CN segmentation (blue bars) and sequencing data (WES or LI-WGS) for three tumors of the PR RNA  
199 subtype at baseline. (A) Patient MMRF\_1167 had complete loss of RB1 as a result of 13q copy loss (log2  
200 CN = -1.004) and a small deletion (AR = 0.87). (B) Patient MMRF\_1424 had complete loss of RB1 as  
201 a result of 13q copy loss (log2 CN = -0.9708) and an inversion where the breakpoint in the intronic region  
202 between exons 2 and 3 prevents splicing. (C) Patient MMRF\_1595 had complete loss of RB1 as a result  
203 of 13q copy loss (log2 CN = -1.006) and a second interstitial deletion (log2 CN = -5.3759) including all  
204 RB1 exons except exon 1.

205 **5 Transition to PR at Progression and Link with G1/S**

206 **5.1 Change in RNA Subtype Probabilities Over Time**

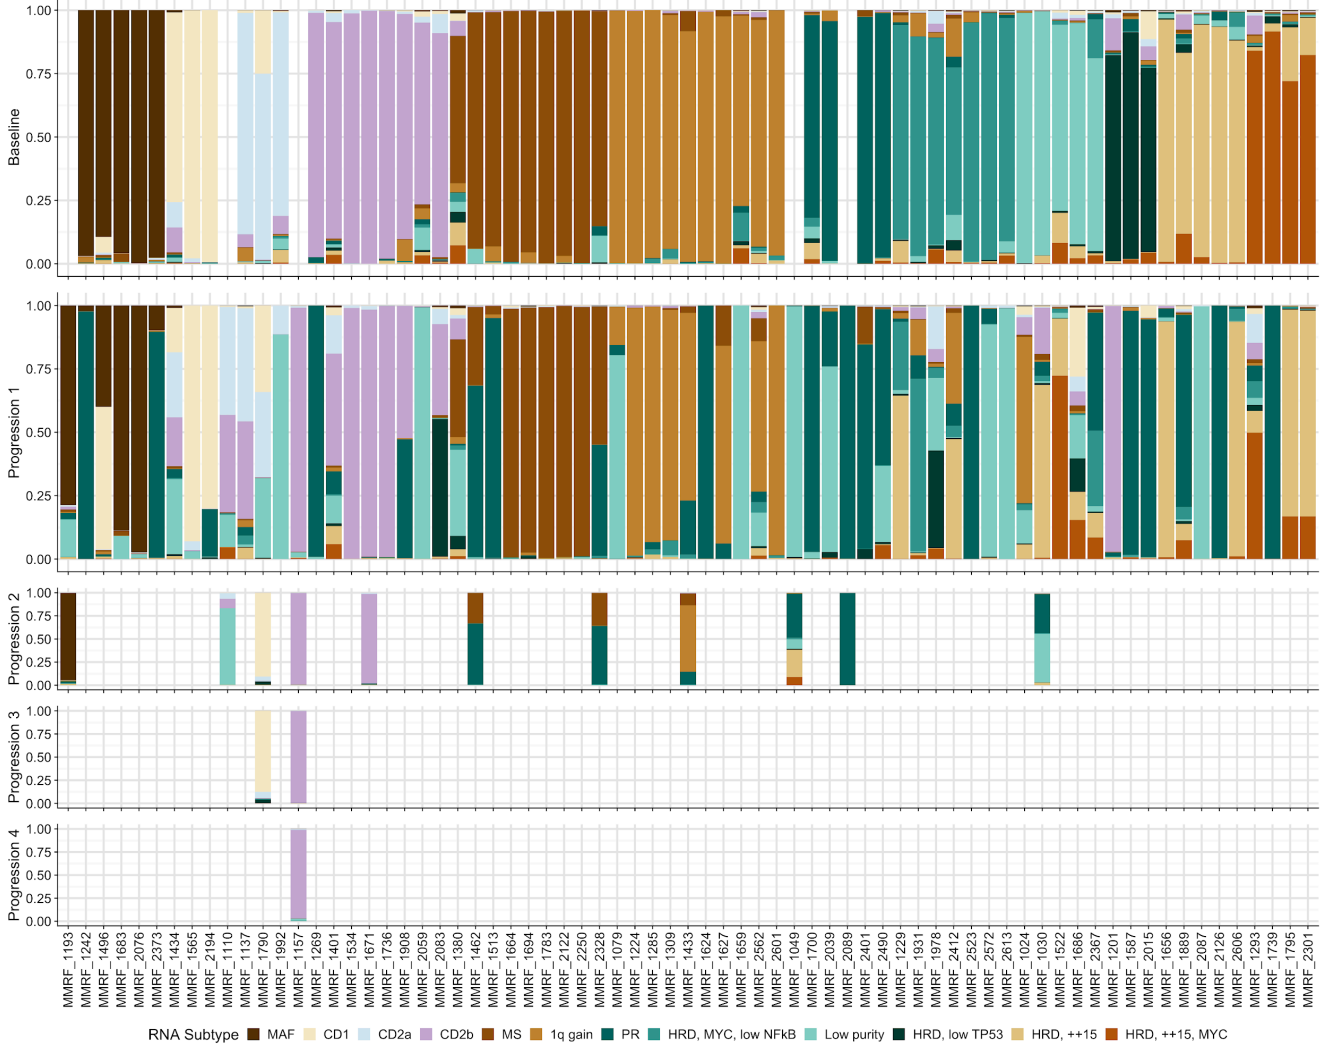

207  
208

209 RNA subtype probabilities for the 71 serial patients with RNAseq data at two or more timepoints. All  
210 patients classified in the low purity subtype at baseline have a discernable RNA subtype other than low  
211 purity at progression, supporting the observation that this subtype is driven by sample purity. Shifts from  
212 a non-PR baseline subtype to a largely PR subtype or partial population of PR cells are evident.

213 5.2 Overall Survival of Patients After Transition to PR Subtype

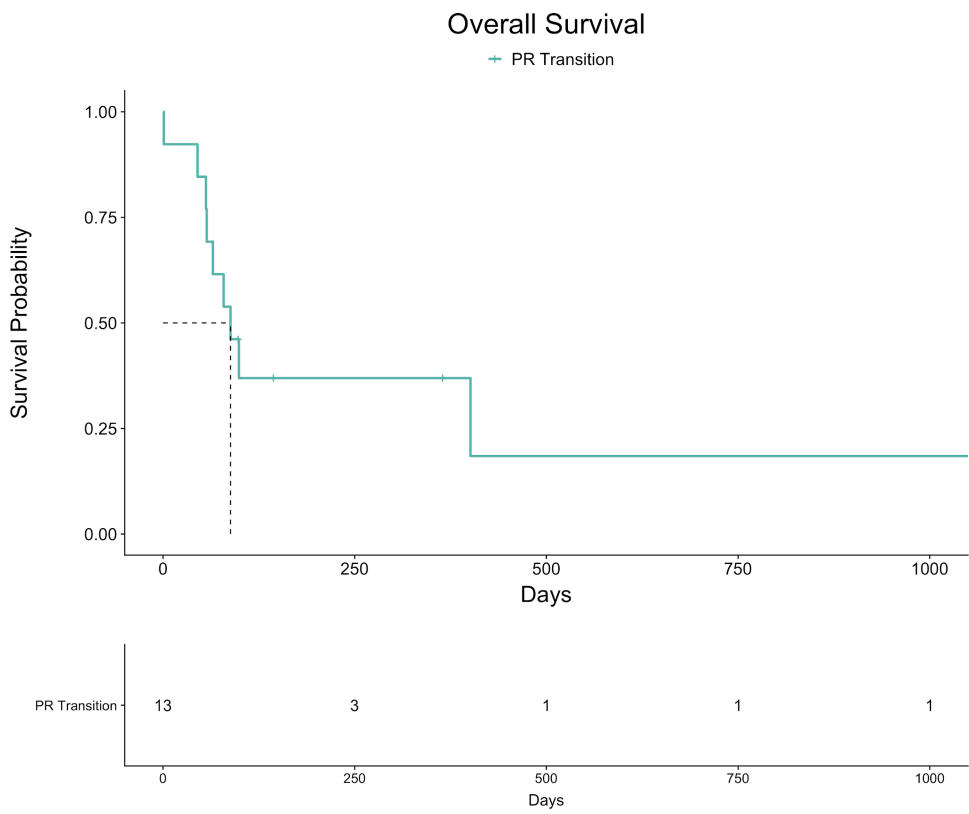

214 OS outcome for the 13 patients that transition to the PR subtype at progression from any non-PR RNA  
 215 subtype at baseline, excluding the low purity subtype. Days are landmarked to the date at which the  
 216 progression visit bone marrow sample was obtained to the date of last follow up (no OS censor flag, 4  
 217 patients) or to the date of death (OS censor flag, 9 patients). Patients that transitioned to the PR subtype  
 218 exhibited extremely poor survival outcomes, with median OS of 88 days (3 months) after the progression  
 219 visit.  
 220

221 5.3 Deletion of of CDKN2C in Patients that Transitioned to PR

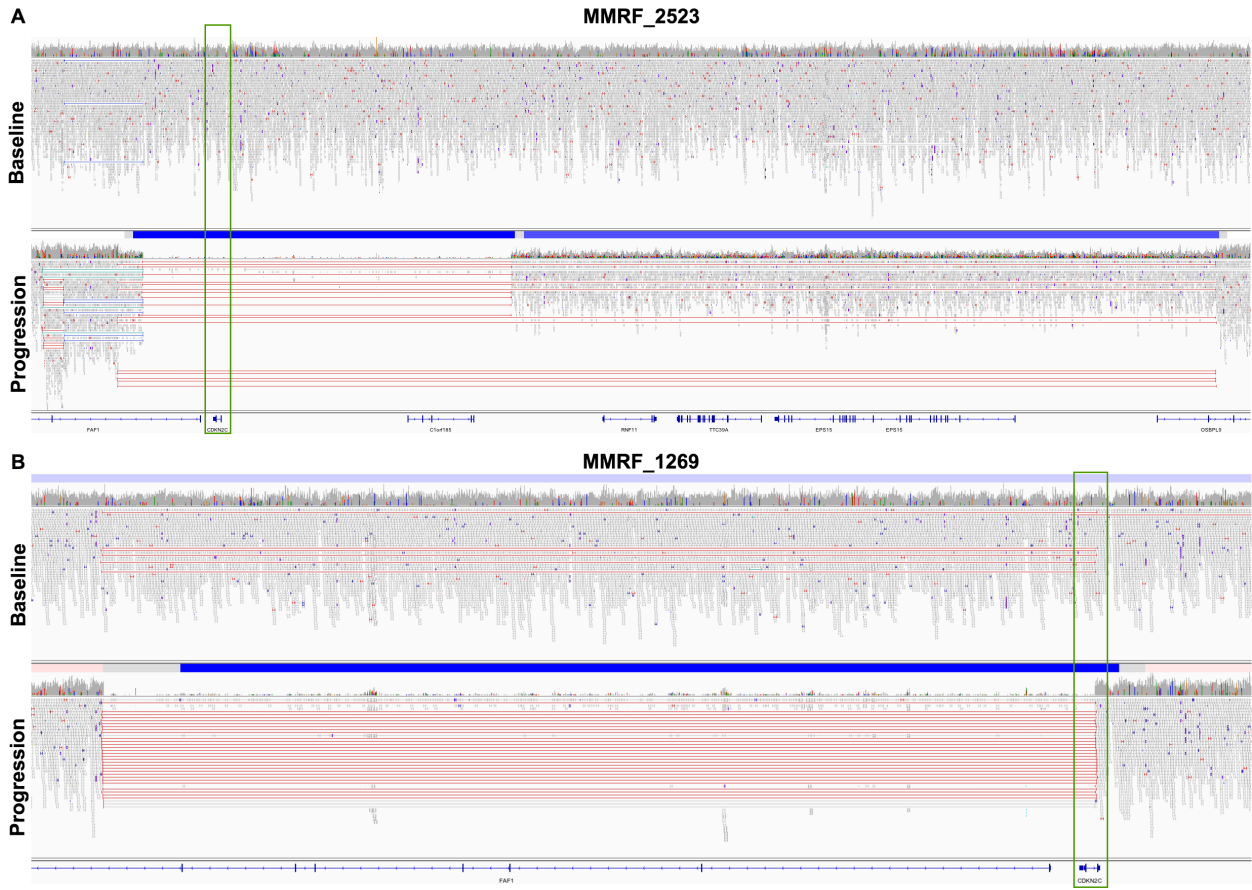

222  
223

224 Two patients that transitioned to the PR subtype at progression acquired complete loss of function of  
 225 CDKN2C due to overlapping deletion. Panels show long-insert WGS reads from tumor samples for  
 226 patients MMRF\_2523 (A) and MMRF\_1269 (B) at baseline (non-PR) and progression (PR). (A) At  
 227 baseline, patient MMRF\_2523 was diploid ( $\log_2 \text{CN} = -0.0747$ ) with no evidence of a deletion spanning  
 228 CDKN2C however, at progression the patient had a 2-copy deletion of CDKN2C (blue bar,  $\log_2 \text{CN} = -$   
 229 3.3505) due to two unique deletions (red bars) spanning CDKN2C (green box). (B) At baseline, patient  
 230 MMRF\_2523 had a 1 copy loss of CDKN2C (light blue bar,  $\log_2 \text{CN} = -0.3511$ ) due to a larger deletion  
 231 on chr1. There is also read evidence supporting a deletion involving CDKN2C/FAF1, suggesting that a  
 232 subclonal population with complete loss of CDKN2C was present at diagnosis in this patient. At  
 233 progression, when the patient transitioned to PR, the patient's tumor had a 2-copy deletion of CDKN2C  
 234 (dark blue bar,  $\log_2 \text{CN} = -4.6212$ ). In this patient, the minor clone harboring the CDKN2C deletion at  
 235 baseline constitutes the bulk of the tumor population at progression.

236 5.4 Deletion of of CDKN1B in Patient that Transitioned to PR

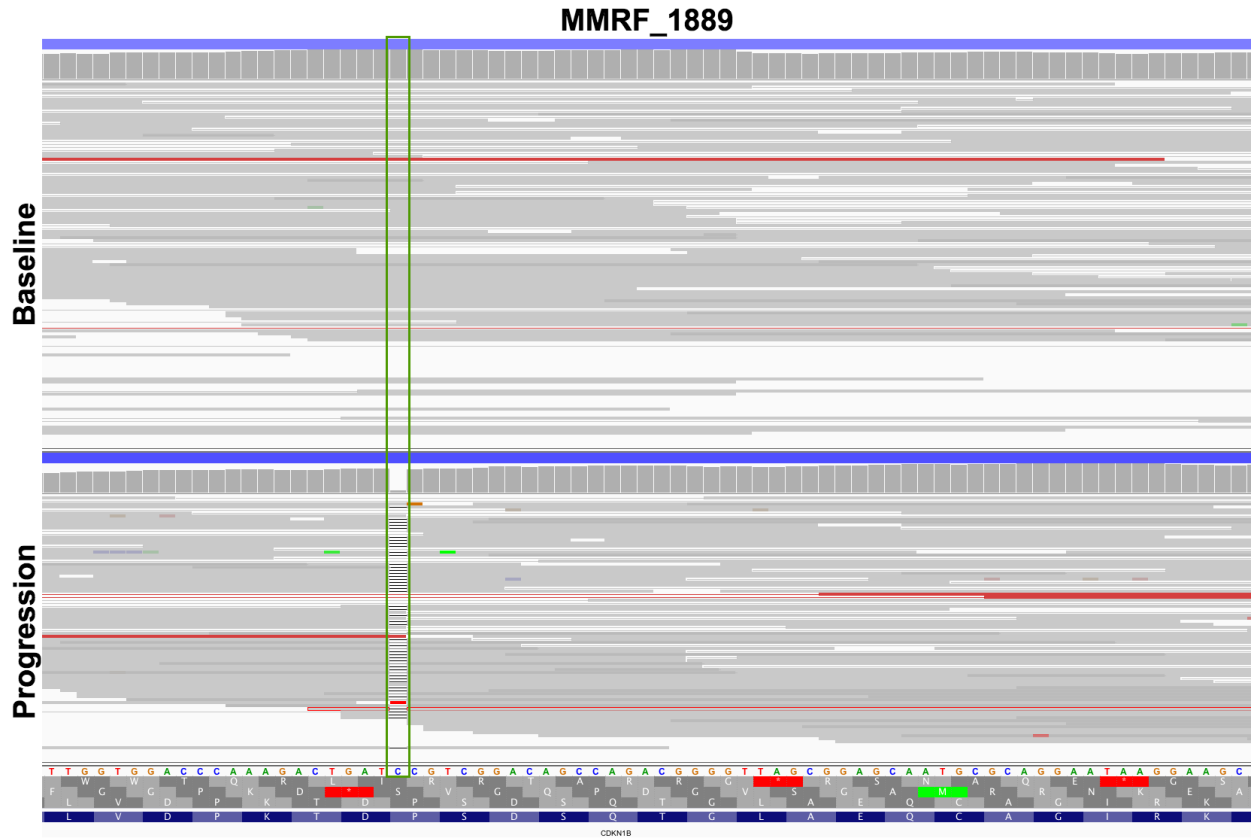

237  
 238 One patient that transitioned to the PR subtype at progression acquired complete loss of function of  
 239 CDKN1B due to copy loss and mutation. Panels A and B show WES data for patient MMRF\_1889 at (A)  
 240 baseline and (B) progression, when the patient transitioned to the PR subtype. (A) At baseline the patient  
 241 had a one copy loss of CDKN1B due to an arm-level deletion of 12p. (B) At progression, the patient had  
 242 complete loss of CDKN1B due to copy loss of 12p and a clonal frameshift mutation (AR = 0.98). There  
 243 was no read evidence supporting the existence of a subclone with this mutation at diagnosis, suggesting  
 244 that this mutation was acquired.
